1

2

3

4

## Root Colonization and Growth Promotion of Soybean,

5

## Wheat and Chinese Cabbage by *Bacillus cereus* YL6

6

7

8 Yongli Ku<sup>1†</sup>, Guoyi Xu<sup>1†</sup>, Fawei Wang<sup>2</sup>, Haijin Liu<sup>3</sup>, Xiangna Yang<sup>1</sup>, Xiaohong Tian<sup>4</sup>, Cuiling

9 Cao<sup>1\*</sup>

10 <sup>1</sup> College of Life Sciences, Northwest A&F University, Yangling, 712100, P.R. China

11 <sup>2</sup> China Mobile Tietong Inner Mongolia Branch, Hohhot, 010000, P.R. China

12 <sup>3</sup> College of Veterinary Medicine, Northwest A&F University, Yangling, 712100, P.R. China

13 <sup>4</sup> College of Resources and Environment, Northwest A&F University, Yangling, 712100, P.R. China

14 <sup>†</sup>These authors contributed equally to this work.

15 \* Corresponding author's e-mail: [culingcao@163.com](mailto:culingcao@163.com)

### 16 Abstract

17 Phosphate-solubilizing bacteria (PSB) have been isolated and used in agricultural production. However,  
18 comprehensive research on PSB colonizing the rhizosphere of different plants and promoting plant  
19 growth is lacking. This study was conducted to study the growth-promoting effects and colonizing  
20 capacity of the PSB strain YL6. The YL6 strain not only increased the biomass of pot-planted soybean  
21 and wheat but also increased the yield and growth of Chinese cabbage under field conditions. The  
22 promotion of growth in these crops by strain YL6 was related to its capacities to dissolve inorganic and  
23 organic phosphorus and to produce a certain amount of indole-3-acetic (IAA) and gibberellin (GA). After

24 YL6 was applied to soybean, wheat and Chinese cabbage, the rhizosphere soil available phosphorus  
25 (available P) content increased by 120.16%, 62.47% and 7.21%, respectively, and the plant total  
26 phosphorus increased by 198.60%, 6.20% and 78.89%, respectively, compared with those of plants  
27 without the addition of YL6. To determine whether the phosphate solubilizing bacteria colonized these  
28 plants, YL6 labeled with green fluorescent protein (YL6-GFP) was inoculated into plant rhizospheres.  
29 YL6-GFP first colonized the root surface and hairs and then penetrated into intercellular spaces and  
30 vessels. Collectively, these results demonstrate that YL6 promoted the growth of three different crops  
31 and colonized them in a similar way and therefore provide a solid foundation for probing into  
32 mechanisms by which phosphate-solubilizing bacteria affect plant growth.

33 **Keywords:** Phosphate-solubilizing bacteria; Colonization; Different crops; Promoting effect

## 34 **Introduction**

35 Phosphorus as one essential element and the primary growth-limiting factor for plant growth plays  
36 significant roles in some major metabolic processes, such as photosynthesis, respiration, and molecular  
37 synthesis [1]. Phosphorus as a nonrenewable resource has attracted much attention [2]. In soil, the  
38 primary phosphorus forms are apatite, calcium phosphate and organic phosphorus, which have relatively  
39 low phosphorus availabilities for plants [3]. Readily available P deficiencies restrict crop yields. To  
40 address this problem, large amounts of phosphate fertilizers must be applied. Of phosphorous fertilizer,  
41 80-90% is fixed as insoluble P and only a very small part is available for plants [4]. The soil accumulation  
42 of insoluble P leads to environmental pollution [5]. Thus, approaches to increase efficiencies of  
43 phosphate fertilizers and make soil insoluble P environmentally friendly are urgently required.

44 Phosphate-solubilizing bacteria (PSB) are required for a series of biochemical reactions to convert  
45 insoluble P to absorbable and available forms [6,7]. The primary mechanisms behind these reactions are  
46 the following: (a) PSB secrete organic acids, such as gluconic, acetic, and citric acids, to dissolve mineral  
47 complexes; and (b) PSB produce phosphatase enzymes to degrade insoluble organic P [8,9]. Similar to  
48 other plant growth-promoting rhizobacteria (PGPR), some PSB strains can promote plant growth by  
49 producing indole-3-acetic (IAA) and gibberellin (GA) [10,11]. Therefore, application of PSB in  
50 agricultural production is an important way to achieve phosphorus cycling and sustainable development  
51 in farmlands. Many studies demonstrate that application of PSB into the plant rhizosphere can improve

52 plant growth [12]. For example, Walpola and Yoon [13] verified promoting effects of PSB on tomato  
53 growth.

54 Studying the colonization and distribution of endophytic bacteria in plants enriches our knowledge  
55 about how bacteria affect plant growth. The green fluorescent protein (GFP), first isolated from *Aequorea*  
56 *victoria*, is widely used as a marker in studying gene expression and bacteria localization [14,15].  
57 Furthermore, GFP-labeled bacteria are easily detected without requiring isolation, culturing and  
58 identification; thus, GFP is an ideal tool for studying the colonization of endophytic bacteria in plants.  
59 Actually, many PGPR tagged with GFP are employed to study microbial colonization patterns, leading  
60 to certain advances [16-18].

61 However, because of a lack of systematic studies, whether PSB strains can promote the growth of and  
62 colonize in different crops in a similar way remains unclear. In this study, the YL6 strain, a bacterial  
63 strain that dissolves inorganic and organic phosphorus, was applied to soybean (*Glycine max* L. Merr.),  
64 wheat (*Triticum aestivum* L.) and Chinese cabbage (*Brassica rapa* L., *Chinensis Group*) under different  
65 conditions. Additionally, YL6-GFP, a GFP-marked YL6 strain, was employed to study the PSB  
66 colonization of the three different crops. The YL6 strain similarly promoted the growth of these plants  
67 by dissolving inorganic and organic phosphorus and producing certain amounts of IAA and GA in soil.  
68 Moreover, YL6-GFP also colonized the different plants in a similar approach.

## 69 **Materials and methods**

### 70 **Ethics statement**

71 This work was conducted in our scientific research field for PSB *Bacillus cereus* studies, which is owned  
72 by our institution. Therefore, no specific permissions were required for these using these locations or  
73 performing the study. And this field did not involve endangered or protected species.

### 74 **Test strain**

75 The PSB YL6 maintained by our laboratory was isolated from the rhizosphere of Chinese cabbage at a  
76 soil depth of 10 cm at the Yangling Experiment Farm of Northwest A&F University (34.30° N, 108.08°  
77 E), Shaanxi, China. Based on 16s rRNA testing, YL6 was identified as *Bacillus cereus* of which the  
78 GenBank accession number was KX580383 [9].

## 79 **Phosphate-solubilizing capacities and growth-promoting substances of YL6**

80 Purified YL6 was inoculated into 100 ml of inorganic phosphorus liquid medium (glucose 10 g/l,  
81 (NH<sub>4</sub>)<sub>2</sub>SO<sub>4</sub> 0.5 g/l, NaCl 0.3 g/l, KCl 0.3 g/l, MgSO<sub>4</sub>•7H<sub>2</sub>O 0.3 g/l, FeSO<sub>4</sub>•7H<sub>2</sub>O 0.03 g/l, MnSO<sub>4</sub>•4H<sub>2</sub>O  
82 0.03 g/l, CaCO<sub>3</sub> 10 g/l, pH 7) [19] and incubated for 24, 48 and 72 h at 30°C on a shaker running at 180  
83 rpm in triplicate to measure soluble P and organic acids in the culture medium. For each repetition, 20  
84 ml of the medium was taken and centrifuged at 13,000 g for 10 min to obtain cell-free supernatants. The  
85 soluble P contents of the supernatants were determined by the molybdate blue method [20]. To determine  
86 organic acids by High-Performance Liquid Chromatography (HPLC), the supernatants were filtered with  
87 0.45-µm nylon filters (Millipore Corp, Billerica, MA, USA). Then, 20 µL of this leachate was injected  
88 into the HPLC instrument (Essentia LC-15C, Japan), which was equipped with a C-18 column and run  
89 at the flow rate of 1 ml/min using 90:10 (v/v) methanol-phosphate buffer (10 mmol/l) of pH 2.7 as the  
90 mobile phase; this process was monitored at 210 nm [21-23]. Additionally, purified YL6 were inoculated  
91 into 100 ml of organic phosphorus liquid medium (Extractum carnis 5 g/l, peptone 10 g/L, NaCl 5 g/l,  
92 pH 7.0; after 20 min, the medium was sterilized at 121°C, and 40 ml of a mixture of yolk and  
93 physiological saline at the ratio of 1:1 was added) [24] in triplicate and incubated at 30°C for 24 h on a  
94 shaker running at 180 rpm. The production of soluble P and acid, alkaline and neutral phosphatase  
95 activity of YL6 were measured by the *p*-nitrophenyl phosphate method [25].

96 Purified YL6 were inoculated into 100 ml of LB liquid medium in triplicate and incubated at 30°C for  
97 24 h on a shaker running at 180 rpm. For each repeat, 20 ml was centrifuged at 13,000 g for 10 min to  
98 obtain cell-free supernatants, which were used to measure the YL6 capacity to produce IAA and GA by  
99 the Salkowski colorimetric assay [26] and fluorimetry assay [27].

## 100 **Influences of YL6 on rhizosphere soil and biomass of different crops**

### 101 **Soybean pot experiment**

102 Our laboratory purchased soybean seeds (Zhonghuang 13). Calcareous soil that was not planted and  
103 fertilized over many years was collected from the Medicinal Garden of Northwest A&F University (34.25°  
104 N, 108.06° E) and then air-dried and sifted through a 2 mm sieve. The bottom diameters and heights of  
105 the test pots were 28 cm. Each pot was filled with 3 kg of soil, and 6 soybean seeds were sown in each

106 pot. The YL6 strain was incubated at 30°C×180 rpm for 48 h in LB liquid medium to produce YL6 agent.  
107 The three treatments were the following: (1) YL6 (180 ml of  $2.8 \times 10^8$  cfu/ml YL6 agent added at soybean  
108 seedling emergence, (2) M (Pure medium with no strains added at the same time as the YL6 treatment),  
109 and (3) CK (the control without any treatments). All the treatments were repeated five times. After  
110 seedling germination, two seedlings in good growth condition were kept in each pot. The soil absolute  
111 water content was maintained at 20-22%. When the soybean seedlings had three compound leaves, 8  
112 plants were randomly collected in each of the treatments.

113 Root and shoot fresh and dry weights and total fresh and dry biomass of soybeans were measured  
114 directly. Dry weights were determined after drying for 48 h at 80°C in an air oven, and the R/S ratio was  
115 the ratio of root dry weight and shoot dry weight [28]. The soybean vegetative growth and bean pod  
116 indexes (including stem diameter, primary branch number, and pod length, width and number) were  
117 directly measured.

118 Each fresh soil sample (2 g) collected from the soybean rhizosphere was placed in a triangular bottle  
119 filled with 18 ml of sterile water and shaken at 30°C on a shaker running at 180 rpm for 30 min. Then,  
120 this mixture was left to settle for a time. Suspensions (1 ml) taken from mixture were diluted to  $10^{-5}$  and  
121 uniformly smeared on inorganic phosphorus agar medium by the plate-smearing method [29]. The  
122 smeared agar medium was incubated (in darkness at 30°C) in a constant temperature incubator for 3  
123 days. At the end of the incubation, the colony numbers of PSB in the soil samples were tallied (cfu/g).  
124 The soil available P was extracted by the bicarbonate method and measured by the molybdate blue  
125 method [30]. Dried individual plants were ground and sifted through a 1 mm sieve, treated with H<sub>2</sub>SO<sub>4</sub>-  
126 HClO<sub>4</sub> and the phosphorus contents were measured by the vanadium molybdenum yellow method [31].

## 127 **Wheat pot experiment**

128 The seeds of wheat (Xiaoyan 22) were from storage in our laboratory in this experiment. The soil and  
129 pots were the same as those in the soybean experiment. Each pot was filled with 3 kg of soil, and 20  
130 wheat seeds were sown in each pot. The 3 treatments in the experiment were as follow: (1) YL6 (180 ml  
131 of  $2.8 \times 10^8$  cfu/ml YL6 agent added at wheat seedling emergence), (2) M (Pure medium with no strains  
132 added at the same time as the YL6 treatment), and (3) CK (the control without any treatments). After  
133 wheat seedlings had 3 leaves, 15 plants were kept in each pot in good growth condition. Each treatment

134 was repeated 3 times. The soil absolute water contents were maintained at 20-22%. At the tillering stage,  
135 36 wheat plants growing identically were randomly selected from 3 pots of each treatment.

136 The height, root length, root fresh and dry weights, shoot fresh and dry weights and total fresh and dry  
137 plant biomass of different treatments were measured directly. The same methods as in the previous  
138 experiment were used to determine soil available P, plant phosphorus and the number of phosphate-  
139 solubilizing rhizosphere bacteria.

#### 140 **Field experiment for Chinese cabbage**

141 Seeds of Chinese cabbage (Shanghaiqing) were from storage in our laboratory. From August 29 to  
142 October 10, 2016, the experiment was conducted at the Yangling Experiment Farm of Northwest A&F  
143 University (34.30° N, 108.08° E). The soil was calcareous soil that was kept idle over many years. The  
144 three treatments were the following: (1) YL6 (1500 ml of  $2.8 \times 10^8$  cfu/ml YL6 agent added at cabbage  
145 seedling emergence), (2) M (Pure medium with no strains added at the same time as the YL6 treatment),  
146 and (3) CK (the control without any treatments). The experimental fields were divided into 15 identical  
147 plots (2 m×2 m). The design was a randomized block with three replicates. In the growing season of  
148 Chinese cabbage, the experimental farmland was managed scientifically. Then, we sampled ripe  
149 vegetables randomly with the same growth condition for further analysis. Root fresh and dry weights,  
150 shoot fresh and dry weights and total fresh and dry plant biomass of different treatments were measured  
151 directly. To measure the quality of Chinese cabbage, vitamin C was determined by the molybdenum blue  
152 colorimetric method, cellulose and soluble sugar were determined by the anthrone colorimetric method,  
153 soluble protein was determined by the Coomassie blue staining method, and nitrate nitrogen content was  
154 measured by nitration of salicylic acid colorimetry [32].

#### 155 **YL6 colonization on root surfaces of soybean, wheat and Chinese cabbage** 156 **seedlings**

157 GFP-labeled YL6 was constructed in our laboratory, and the stability was tested [9]. Soybean, wheat and  
158 Chinese cabbage were cultured by the sandy culture method. The sand (passed through a 24 mesh sieve)  
159 was washed clean with tap water and sterilized at 120 °C in an oven for 48 h. Then, 1 kg of sterilized  
160 sand was put into individual boxes (195 mm×146 mm×65 mm). Tap water was added to the pot to  
161 maintain absolutely the water content range within 8-12%. The seeds of soybean, wheat and Chinese

162 cabbage were sterilized with 10 mL of 2% NaClO (13% active Cl<sup>-</sup> content) for 10 min. Then, the seeds  
163 were rinsed 5 times with sterile water. The aseptic seeds were soaked in warm water for 30 min, and  
164 those that floated up on the surface of the water were removed. The remaining seeds were evenly sown  
165 on three stacked wet filter papers in culture dishes. The culture dishes were incubated at 28 °C in the  
166 darkness in an incubator for 2 days. Water was added every 8 h to keep filter papers wet. After  
167 germination, seeds were incubated at 28 °C under the day/dark pattern of 16 h/8 h. Subsequently, the  
168 different seeds were transplanted into different culture boxes with sand. When the seedlings grew 3  
169 primary leaves and developed a root system, the YL6-GFP bacterial suspension ( $2.8 \times 10^8$  cfu/ml) diluted  
170 twice ( $1.35 \times 10^8$  cfu/ml) was added to the culture boxes. At 3, 6 and 9 days after the addition, the seedlings  
171 were collected and rinsed with sterile water. Then, some root tissues were cut into tiny pieces in a  
172 crisscrossed pattern with a sterilized razor blade for bacterial colony observations, with the pieces then  
173 placed in glass dishes by the hydrostatic tablet compressing method. The YL6-GFP endogeny  
174 colonization on fresh roots was visualized by fluorescence microscopy (Olympus CCD-DP26).

## 175 **Statistical analyses**

176 Microsoft Excel 2007 was employed to process the data. The comparisons among the treatments were  
177 performed using the least significant difference (LSD) at  $P < 0.05$ . Adobe Photoshop CS6.0 was used for  
178 photo combinations.

## 179 **Results**

### 180 **Phosphate-solubilizing capacities and production of growth-promoting substances** 181 **of YL6**

182 Because of the difference between the mechanisms by which YL6 dissolved inorganic and organic  
183 phosphorus, the solubilizing phosphorus capacities of the YL6 strain in different liquid culture media  
184 were further investigated (Table 1). First, YL6 was inoculated into organic phosphorus liquid medium to  
185 determine the activity of acid phosphatase, alkaline phosphatase and neutral phosphatase and the  
186 accumulation of available P at the different culture times. When the activities of these phosphatases were  
187 the highest, the content of available P in the medium was also the highest. Thus, the concentration of  
188 available P increased to 152.253 µg/ml at 48 h of culture. Additionally, YL6 secreted oxalic, malonic

189 and succinic acids to increase available P in the inorganic phosphorus liquid medium (Table 1).  
 190 Furthermore, other growth-promoting substances were also detected. For example, the concentrations of  
 191 IAA and GA increased to 29.503 and 30.615 mg/L, respectively, at 24 h of incubation (Table 1). These  
 192 results indicated that the YL6 strain had strong capacities to dissolve different forms of phosphorus into  
 193 available P for plants.

194 **Table 1. The ability of YL6 to dissolve phosphorus and produce auxins.**

| Time | Organic phosphorus liquid medium inoculated with YL6 |                  |                     |               | Inorganic phosphorus liquid medium inoculated with YL6 |              |               | LB liquid medium inoculated with YL6 |              |              |
|------|------------------------------------------------------|------------------|---------------------|---------------|--------------------------------------------------------|--------------|---------------|--------------------------------------|--------------|--------------|
|      | Alkaline phosphatase                                 | Acid phosphatase | Neutral phosphatase | Soluble P     | Oxalate                                                | Malonic acid | Succinic acid | Soluble P                            | IAA          | GA           |
|      | µg pNP/ ml/ h                                        | µg pNP / ml/ h   | µg pNP/ ml/ h       | mg/ ml        | µg/ mL                                                 | mg / ml      | mg/ ml        | µg/ ml                               | mg/ l        | mg/ l        |
| 24 h | 25.913±0.759                                         | 27.863±0.006     | 25.433±0.056        | 128.635±1.767 | 1085.95                                                | 1011.47      | 405.71        | 5.122±0.531                          | 29.503±0.026 | 30.615±3.931 |
| 48 h | 28.993±0.719                                         | 31.140±0.231     | 30.942±0.360        | 162.114±3.635 | 1306.15                                                | 1058.20      | 593.71        | 9.329±0.214                          | -            | -            |
| 72 h | 26.309±0.040                                         | 25.188±0.752     | 26.789±0.719        | 152.253±3.437 | 1042.41                                                | 621.84       | 373.55        | 8.721±0.991                          | -            | -            |

195 Values are the mean±SE of three replicates. Within each vertical column, values followed by the same letter are not significantly different,  
 196 according to Fisher's protected LSD ( $P < 0.05$ ), with the same below.

### 197 **Influence of YL6 on biomass and quality of the different crops**

198 To test whether this PSB could promote plant growth, soybean, wheat and Chinese cabbage carrying the  
 199 YL6 strain were planted. Based on the phenotypes of these crops, YL6 treatment obviously improved  
 200 growth (Figs 1-3). Furthermore, the fresh and dry weights of roots, shoots and plants of the crops treated  
 201 with the YL6 strain were much higher than those of the M and CK groups (Table 2). For soybean, the  
 202 R/S ratio of the YL6 group increased by 28.8% ( $P < 0.05$ ) compared with that of the CK group. Different  
 203 indexes of soybean growth and the bean pod (stem diameter, primary branch number, and pod length,  
 204 width and number) also increased significantly with YL6 strain inoculation compared with those of the  
 205 control (Table 3), and the number, length and width of soybean pods increased significantly by 16.81%,  
 206 94.34% and 251.13%, respectively ( $P < 0.05$ ). YL6 increased wheat and Chinese cabbage biomass  
 207 compared with that of CK and M groups. In addition to the biomass indexes, the nutritional values of  
 208 Chinese cabbage were also determined. We found that leaf vitamin C, soluble sugar, soluble protein and  
 209 cellulose were the highest in the YL6 strain treatment, reaching 2.105, 15.610, 15.695 and 42.539 mg/g  
 210 ( $P < 0.05$ ), respectively (Table 4). Another important index of Chinese cabbage is the content of nitrate



211 nitrogen, which can be transformed into nitrates harmful to humans. Although the nitrate nitrogen  
 212 contents in these groups were not different from one another ( $P < 0.05$ ), the nitrate nitrogen content in  
 213 the YL6 group was lower (Table 4). Based on these results, the PSB YL6 strain significantly improved  
 214 the growth of the different crops.

215 **Fig 1. Effect of YL6 on promotion of growth in soybean.** CK, control group; M, treatment with liquid  
 216 medium without the strain; YL6, treatment with the YL6 agent.

217 **Fig 2. Effect of YL6 on promotion of growth in wheat.** CK, control group; M, treatment with liquid  
 218 medium without the strain; YL6, treatment with the YL6 agent.

219 **Fig 3. Effect of YL6 on promotion of growth in Chinese cabbage.** CK, control group; M, treatment  
 220 with liquid medium without the strain; YL6, treatment with the YL6 agent.

221 **Table 2. Effect of YL6 on soybean, wheat and Chinese cabbage biomass.**

| Crop type       | Treatment | Shoot fresh                     | Root fresh                      | Shoot dry                       | Root dry                        | Fresh                            | Dry                | R/S<br>(DW/DW) | Yield/plot<br>kg |
|-----------------|-----------|---------------------------------|---------------------------------|---------------------------------|---------------------------------|----------------------------------|--------------------|----------------|------------------|
|                 |           | weight<br>g/plant <sup>-1</sup> | weight<br>g/plant <sup>-1</sup> | weight<br>g/plant <sup>-1</sup> | weight<br>g/plant <sup>-1</sup> | biomass<br>g/plant <sup>-1</sup> | biomass<br>g/plant |                |                  |
| Soybean         | CK        | 2.72±0.06c                      | 1.36±0.06c                      | 0.42±0.02c                      | 0.10±0.04c                      | 4.08±0.15c                       | 0.52±0.01c         | 0.25±0.02b     | -                |
|                 | M         | 3.47±0.19b                      | 1.52±0.05b                      | 0.61±0.00b                      | 0.20±0.01b                      | 4.99±0.057b                      | 0.81±0.01b         | 0.32±0.01a     | -                |
|                 | YL6       | 4.65±0.10a                      | 2.75±0.07a                      | 0.74±0.02a                      | 0.24±0.01a                      | 7.40±0.14a                       | 0.97±0.02a         | 0.32±0.01a     | -                |
| Wheat           | CK        | 0.55±0.18c                      | 0.04±0.00b                      | 0.14±0.02c                      | 0.02±0.01c                      | 0.65±0.26b                       | 0.16±0.03c         | 0.16±0.01a     | -                |
|                 | M         | 1.13±0.16b                      | 0.09±0.01b                      | 0.27±0.01b                      | 0.04±0.01b                      | 1.15±0.04a                       | 0.30±0.02b         | 0.13±0.01b     | -                |
|                 | YL6       | 2.32±0.20a                      | 0.25±0.07a                      | 0.57±0.00a                      | 0.09±0.00a                      | 2.66±0.15a                       | 0.67±0.00a         | 0.16±0.00a     | -                |
| Chinese cabbage | CK        | 12.68±0.63d                     | 0.47±0.06d                      | 0.99±0.06d                      | 0.08±0.02d                      | 13.15±0.64b                      | 1.07±0.07c         | 0.08±0.00b     | 2.21±0.09c       |
|                 | M         | 22.93±1.01c                     | 1.34±0.03c                      | 1.66±0.18c                      | 0.19±0.02c                      | 24.07±0.96b                      | 1.11±1.03c         | 0.11±0.02a     | 2.57±0.03c       |
|                 | YL6       | 43.61±5.62b                     | 1.57±0.23b                      | 2.74±0.29b                      | 0.25±0.05b                      | 44.76±5.33b                      | 3.04±0.24b         | 0.11±0.02a     | 3.87±0.39b       |

222 **Table 3. Effect of phosphate-solubilizing bacteria on soybean vegetative growth and bean pods.**

| Treatment | Stem diameter | Primary branch | Pod length  | Pod width   | Pod         |
|-----------|---------------|----------------|-------------|-------------|-------------|
|           | (cm)          | number         | (cm)        | (cm)        | number      |
| CK        | 0.39±0.018b   | 4.67±0.577b    | 3.45±0.071b | 0.53±0.058b | 1.33±0.577b |

|     |             |              |             |             |             |
|-----|-------------|--------------|-------------|-------------|-------------|
| M   | 0.41±0.031b | 6.33±1.155b  | 3.50±0.000b | 0.53±0.058b | 1.33±0.577b |
| YL6 | 0.51±0.026a | 11.00±2.000a | 4.03±0.058a | 1.03±0.058a | 4.67±0.577a |

223 **Table 4. Effect of different treatments on the quality of Chinese cabbage.**

| Treatment | Cellulose     | Vitamin C    | Soluble sugar of | Soluble protein of leaves | Nitrate nitrogen of |
|-----------|---------------|--------------|------------------|---------------------------|---------------------|
|           |               |              | leaves           |                           | leaves              |
|           | mg/g          | mg/g         | mg/g             | mg/g                      | mg/g                |
| CK        | 6.445±0.337c  | 1.986±0.079b | 12.004±1.246c    | 19.817±0.469c             | 1.140±0.116a        |
| M         | 7.575±0.569c  | 2.059±0.140b | 13.305±0.831c    | 31.108±1.713b             | 1.064±0.069a        |
| YL6       | 15.610±2.613b | 2.105±0.127b | 15.695±0.672b    | 42.539±4.491a             | 1.062±0.052a        |

224 **Plant phosphorus, number of soil phosphate-solubilizing bacteria and soil**  
 225 **available P**

226 The amount of plant phosphorus was determined to check whether the YL6 strain promoted soybean,  
 227 wheat and Chinese cabbage growth by helping plants absorb soil phosphorus. First, PSB strains in  
 228 rhizosphere soils of these crops were counted. Numbers of PSB strains increased with the application of  
 229 YL6 and were 13, 35 and 10-fold those of the CK group in soybean, wheat and Chinese cabbage,  
 230 respectively (Table 5). The increase in PSB strains generated more available P in soil (Table 6). For  
 231 example, the soil available P content in the YL6 group was 120.16% higher than that in the CK group in  
 232 the soybean pot experiment. The increase in available soil P was easily utilized by the plants, which led  
 233 to an increase in the total P contents of soybean, wheat and Chinese cabbage (Table 7). The total P  
 234 contents of soybean, wheat and Chinese cabbage in the YL6 group were 198.60, 6.20 and 78.89% higher  
 235 than those in the CK groups, respectively. These results indicated that the YL6 strain similarly promoted  
 236 the growth of different crops by increasing available soil P for plants.

237 **Table 5. Effect of YL6 on the number of phosphate-solubilizing bacteria in rhizosphere soil ( $1 \times 10^5$  cfu).**

| Crop            | CK     | M     | YL6   |
|-----------------|--------|-------|-------|
| Soybean         | 0.009c | 0.08b | 0.12a |
| Wheat           | 0.01c  | 0.16b | 0.35a |
| Chinese cabbage | 0.35c  | 1.80b | 3.50a |

238 **Table 6. Effect of YL6 on soil available phosphorus (mg/kg).**

| Crop            | CK            | M             | YL6           |
|-----------------|---------------|---------------|---------------|
| Soybean         | 2.530±0.050b  | 2.720±0.030b  | 5.570±0.230a  |
| Wheat           | 13.788±0.654c | 18.942±1.332b | 22.401±1.378a |
| Chinese cabbage | 18.898±1.976b | 19.254±1.793b | 20.261±1.744a |

239 Table 7. Effect of YL6 on plant phosphorus (mg/g).

| Crop            | CK           | M            | YL6          |
|-----------------|--------------|--------------|--------------|
| Soybean         | 1.220±0.050b | 2.081±0.030b | 3.643±0.230a |
| Wheat           | 1.579±0.016b | 1.671±0.030a | 1.677±0.032a |
| Chinese cabbage | 1.179±0.212b | 1.395±0.000b | 2.109±0.130a |

## 240 Root colonization of the different crops by YL6

241 In addition to testing the capacities of the PSB to promote the growth of crops, the colonization by a  
242 GFP-labeled strain of PSB, YL6-GFP, was examined. Under fluorescence microscopy, the YL6-GFP  
243 strain was detected only at root hairs of the three crops three days after inoculation, suggesting that YL6-  
244 GFP first attached to root hair surfaces of the crops and then penetrated into the root hairs (Fig 4A and  
245 4C; Fig 5A and 5C; Fig 6A and 6C). Many fluorescent points were observed in the intercellular spaces  
246 of the root cortex of soybean on the sixth day after inoculation (Fig 4E and 4G). YL6-GFP was also  
247 distributed in the intercellular spaces of and even inside epidermal cells (Fig 5E, 5G, and 5I). Additionally,  
248 this strain colonized on the surfaces of epidermal cells of Chinese cabbage (Fig 6G). Finally, the YL6-  
249 GFP strain appeared in the vessels of these plants, because the green fluorescent strain was detected in  
250 the vessels of branch roots, roots and different samples of soybean, wheat and Chinese cabbage on the  
251 ninth day after inoculation (Fig 4I and K; Fig 5K; Fig 6I and K). These results suggested that the YL6-  
252 GFP colonized the different plants through a similar process: attaching first to the root hair, then  
253 penetrating into the vessels and finally expanding into the other organs.

254 **Fig 4. Colonization process of YL6-GFP in soybean root tissue.** A longitudinal picture of root; C  
255 picture of root hairs and surface of primary root; E, G intercellular space of cortex; I, L YL6-GFP in the  
256 vessels of branch roots. B, D, F, H, J, and L were taken under bright field.

257 **Fig 5. Colonization process of YL6-GFP in wheat root tissue.** A, C surface of primary root and root  
258 hairs; E, I some epidermal cells colonized by YL6-GFP; G some bacteria distributed in intercellular

259 spaces between cells; **K** YL6-GFP in the vessels of branch roots. **B, D, F, H, J, and L** were taken under  
260 bright field.

261 **Fig 6. Colonization process of YL6-GFP in Chinese cabbage root tissue.** **A, C** YL6-GFP on the root  
262 hairs and surface of primary root; **E, G** some epidermal cells colonized by YL6-GFP; **I, K** YL6-GFP in  
263 the vessels. **B, D, F, H, J, and L** were taken under bright field.

## 264 **Discussion**

265 Phosphorus is a limiting factor in agricultural production [33]. Calcareous soil is widely distributed in  
266 northwest China, and lack of available P in the region restricts agricultural activities. Research on PSB  
267 provides new ideas to solve the problem of low phosphorus availability. According to many scholars,  
268 *Bacillus subtilis* KPS-1, *Pseudomonas dimnuta* RS-1, *Xanthomonas* sp. RS-3, *Exiguobacterium* sp. RS-  
269 4, and *Alcaligenes faecalis* Ss-2 have remarkable phosphorus-dissolving capacities [34-36]. Biological  
270 methods that use PSB to solve agricultural problems have huge potential in the future. In this study, three  
271 common crops were examined, soybean, wheat and Chinese cabbage. Soybean (*Glycine max* L. Merr.)  
272 is one of the most important crop plants for seed proteins and vegetable oil [37], and wheat (*Triticum*  
273 *aestivum* L.) is widely planted worldwide with the caryopsis one of the staple foods for humans. Chinese  
274 cabbage (*Brassica rapa* L., *Chinensis Group*) is a dicotyledonous plant that is a popular leaf vegetable  
275 in China [38].

276 In this study, the capacities of *Bacillus cereus* YL6 strain to dissolve inorganic and organic P were  
277 examined. Generally, PSB dissolve insoluble-P by secreting organic acids or enzymes [39]. Based on the  
278 testing, YL6 not only produced oxalic, malonic and succinic acids but also secreted acidic, neutral, and  
279 alkaline phosphatases. The contents of the organic acids were the highest at 48 h, and similarly, the  
280 activities of the three types of phosphatases peaked at 48 h. This result indicated that 48 h was the  
281 optimum time for YL6 to dissolve insoluble P under laboratory conditions. The content of soluble-P  
282 increased rapidly in the first 48 h, which was most likely because the many acids produced and  
283 phosphatases secreted promoted PSB transformation of insoluble-P into soluble-P [40] [6]. Increased P  
284 availability improves the root growth of plants and the yield of crops. For example, Sharon isolated one  
285 efficient PSB that increased tomato growth [41]. Furthermore, growth of crops was promoted by YL6  
286 secretions of IAA and GA, which is a result supported by other publications [42-44].

287 The pot experiments with soybean and wheat were conducted to determine the influences of YL6 on  
288 the growth of soybean and wheat. The numbers of PSB in rhizosphere soils of soybean and wheat  
289 increased after the addition of the YL6 strain. Therefore, PSB successfully penetrated into soil and then  
290 increased soil available P content for crop absorption. Thus, the plant total P, biomass and bean pods of  
291 soybean treated with the YL6 strain were obviously higher than those in the other treatments. In the  
292 wheat pot experiment, the content of plant total P and plant biomass with YL6 were also obviously higher  
293 than those of the groups without the YL6 strain.

294 The positive results of the above pot experiments resulted in determining the effects of YL6 under field  
295 conditions. Thus, YL6 was applied under field conditions to study the effects of the different treatments  
296 on the biomass and quality of Chinese cabbage. The number of soil PSB in the YL6 treatment was  
297 significantly higher than that in the other two groups in field conditions, which demonstrated that YL6  
298 could survive in soil. Survival and colonization capacity of YL6 when inoculated in soil are the  
299 prerequisites for this PSB to play an important role in the environment and are the key factors to exert  
300 its phosphate-solubilizing capacities and help plants grow. With more of these bacteria in the soil, the  
301 conditions are more favorable for plant growth [45]. The YL6 strain also improved the growth of Chinese  
302 cabbage in field conditions.

303 PSB primarily rely on the ability to transform insoluble P in the soil into available P [46-48]. YL6  
304 inoculation increased the available P in soil. Chinese cabbage could directly absorb and utilize this soil  
305 available P to promote plant growth and total P accumulation. Therefore, YL6 inoculation markedly  
306 improved growth parameters such as root and shoot dry biomass, yield and total P uptake in  
307 Chinese cabbage, compared with those of the control [46,49,50]. This result is consistent with the  
308 conclusion of Sundara, Akbari and Swarnalakshmi [49,51,52]. YL6 also increased nutritional quality  
309 indexes of Chinese cabbage, such as soluble sugar, soluble protein, and particularly vitamin C. Vitamin  
310 C is a highly active substance, which can improve human immunity and prevent cancer, heart disease  
311 and stroke but can also be used as an important contributor in fighting against aging and adversity [53].  
312 Soluble sugar is also the material basis of polysaccharides, proteins, fats and other macromolecular  
313 compounds in plants. Our results are consistent with those of Hui [54]. Nitrate nitrogen is also an  
314 important indicator to measure vegetable quality. Because nitrite is carcinogenic and causes severe

315 damage to the human body, improving vegetable quality by nitrate nitrogen reduction is an important  
316 task [55]. The content of nitrate nitrogen obviously decreased with the application of YL6. These results  
317 demonstrated positive effects of YL6 that improved the quality of Chinese cabbage.

318 The survival and colonization of PSB in the plant rhizosphere is the basis and prerequisite to promote  
319 plant growth [56]. However, in many cases, PSB do not achieve the desired effect due to insufficient  
320 numbers in the rhizosphere or failure to colonize the rhizosphere or plant [57]. In this study, the pot and  
321 field experiments showed that YL6 universally promoted the growth of the crops. Thus, the study of the  
322 colonization of the crops by YL6 is critical. GFP-labeled YL6 was used to inoculate the rhizosphere of  
323 soybean, maize and Chinese cabbage seedlings. Observation by fluorescence microscopy revealed that  
324 in seedling roots of soybean, wheat and Chinese cabbage, the GFP-labeled YL6 colonized root hairs,  
325 epidermal cells, cortex cells, intercellular spaces and vessels. The results of this study are consistent with  
326 those of other researchers [16,58-60]. Root hairs, root surfaces and epidermal cells were primarily  
327 colonized by YL6 most likely because of chemotaxis toward root exudates [61], because various  
328 carbohydrates, amino acids, organic acids and other compounds in plant root exudates are a source of  
329 nutrients for root-associated bacteria [62]. Additionally, YL6 may overcome cortex barriers by secreting  
330 cell wall degrading enzymes (CWDEs) [63]. Then, YL6 could colonize nutrient-rich intercellular spaces  
331 of plant hosts [64] and spread throughout host plants through xylem vessel lumens [65].

## 332 **Conclusions**

333 The above experiments showed that YL6 not only dissolved soil insoluble P by secreting organic acids  
334 and phosphatases but also successfully colonized crop root tissues and promoted crop growth by  
335 secreting IAA and GA. YL6 inoculation promoted plant growth and quality and improved soil fertility.  
336 Therefore, in conclusion, the application of YL6 is a good choice for cost cutting and pollution control  
337 and to achieve high yields and reduce chemical P fertilizer use. Further research on long-term survival  
338 of PSB under field conditions and PBS colonization mechanisms is required in the future.

## 339 **Funding**

340 The Shaanxi Science and Technology Research and Development Program (No. 2013K01-38) supported  
341 this work.

## 342 **Author Contributions**

343 Conceptualization: YK CC.

344 Data curation: YK GX.

345 Formal analysis: GX.

346 Funding acquisition: CC.

347 Resources: FW

348 Software: GX

349 Supervision: XT CC

350 Validation : CC

351 Visualization: YK XY

352 Writing – original draft: YK GX

353 Writing – review & editing: YK GX HL

354

- 355 1. Khan MS, Zaidi A, Ahemad M, Oves M, Wani PA (2010) Plant growth promotion by phosphate  
356 solubilizing fungi â “ current perspective. Archives of Agronomy & Soil Science 56: 73-98.
- 357 2. Cordell D, Drangert JO, White S (2009) The story of phosphorus: Global food security and food for  
358 thought. Global Environmental Change 19: 292-305.
- 359 3. Abd - Alla M (1994) Phosphatases and the utilization of organic phosphorus by Rhizobium  
360 leguminosarum biovar viceae. Letters in Applied Microbiology 18: 294-296.
- 361 4. Zhang Y, Zou B (2008) Research Progress of Phosphorus solubilizing Bacteria in Soil. Modern  
362 Agricultural Sciences and Technology: 182-184.
- 363 5. Tewari S K DB, Mehrotra S (2004) Cultivation of medicinal plants tool for rural development. J Rural  
364 Tech 3: 147-150.
- 365 6. Panhwar QA, Radziah O, Naher UA, Zaharah AR, Razi MI, et al. (2013) Effect of phosphate-solubilizing  
366 bacteria and oxalic acid on phosphate uptake from different P fractions and growth  
367 improvement of aerobic rice using 32P technique. Australian Journal of Crop Science 7: 1131-  
368 1140.
- 369 7. Zaidi A, Khan MS, Ahemad M, Oves M (2009) Plant growth promotion by phosphate solubilizing  
370 bacteria. Acta Microbiologica Et Immunologica Hungarica 56: 263-284.
- 371 8. Vejan P, Abdullah R, Khadiran T, Ismail S, Nasrulhaq BA (2016) Role of Plant Growth Promoting  
372 Rhizobacteria in Agricultural Sustainability-A Review. Molecules 21.
- 373 9. Wang Z, Xu G, Ma P, Lin Y, Yang X, et al. (2017) Isolation and Characterization of a Phosphorus-

- 374 Solubilizing Bacterium from Rhizosphere Soils and Its Colonization of Chinese Cabbage  
375 (*Brassica campestris* ssp. *chinensis*). *Frontiers in Microbiology* 8.
- 376 10. Thakur D, Kaushal R, Shyam V (2014) Phosphate solubilising microorganisms: role in phosphorus  
377 nutrition of crop plants-a review. *Agricultural Reviews* 35.
- 378 11. Zeng Q, Wu X, Wang J, Ding X (2017) Phosphate solubilization and gene expression of phosphate-  
379 solubilizing bacterium *Burkholderia multivorans* WS-FJ9 under different levels of soluble  
380 phosphate. *Journal of Microbiology & Biotechnology* 27: 844.
- 381 12. Li Y, Liu X, Hao T, Chen S (2017) Colonization and Maize Growth Promotion Induced by Phosphate  
382 Solubilizing Bacterial Isolates. *International Journal of Molecular Sciences* 18.
- 383 13. Walpola BC, Yoon MH (2013) Isolation and characterization of phosphate solubilizing bacteria and  
384 their co-inoculation efficiency on tomato plant growth and phosphorous uptake. *African*  
385 *Journal of Microbiology Research* 7: 266-275.
- 386 14. Gamalero E, Lingua G, Giusy Capri F, Fusconi A, Berta G, et al. (2004) Colonization pattern of primary  
387 tomato roots by *Pseudomonas fluorescens* A6RI characterized by dilution plating, flow  
388 cytometry, fluorescence, confocal and scanning electron microscopy. *Fems Microbiology*  
389 *Ecology* 48: 79-87.
- 390 15. Shi Y, Li C, Yang H, Zhang T, Gao Y, et al. (2017) Colonization study of gfp-tagged *Achromobacter*  
391 *marplatensis* strain in sugar beet. *Journal of Microbiology* 55: 1-6.
- 392 16. Liu X, Zhao H, Chen S (2006) Colonization of maize and rice plants by strain *Bacillus megaterium* C4.  
393 *Current Microbiology* 52: 186.
- 394 17. Hao T, Chen S (2017) Colonization of Wheat, Maize and Cucumber by *Paenibacillus polymyxa* WLY78.  
395 *Plos One* 12: e0169980.
- 396 18. Shi YW, Li C, Yang HM, Tao Z, Yan G, et al. (2017) Colonization study of gfp-tagged *Achromobacter*  
397 *marplatensis* strain in sugar beet. *Journal of Microbiology* 55: 1-6.
- 398 19. Pikovskaya R (1948) Mobilization of phosphorus in soil in connection with vital activity of some  
399 microbial species. *Mikrobiologiya* 17: e370.
- 400 20. Murphy J, Riley JP (1958) A Single-Solution Method for the Determination of Soluble Phosphate in  
401 Sea Water. *Journal of the Marine Biological Association of the United Kingdom* 37: 9-14.
- 402 21. Qin ZX, Li Y, Yu Q (2010) Determination of metabolic organic acids of bifidobacterium by HPLC.  
403 *Modern Preventive Medicine*.
- 404 22. Paavilainen S, Korpela T (1993) Comparison of high-performance liquid and gas chromatography in  
405 the determination of organic acids in culture media of alkaliphilic bacteria. *Journal of*  
406 *Chromatography A* 634: 273-280.
- 407 23. Fernandez L, Agaras B, Zalba P, Wall LG, Valverde C (2012) *Pseudomonas* spp. isolates with high  
408 phosphate-mobilizing potential and root colonization properties from agricultural bulk soils  
409 under no-till management. *Biology And Fertility Of Soils* 48: 763-773.
- 410 24. Zhao X, Lin Q, Sun Y, Zhang Y, Zhang M (2001) Phosphobacteria Distribution in Rhizosphere and  
411 Nonrhizosphere Soil of Corn. *Chinese Journal of Ecology* 20: 62-64.
- 412 25. Tabatabai MA, Bremner JM (1969) Use of p -nitrophenyl phosphate for assay of soil phosphatase  
413 activity. *Soil Biology & Biochemistry* 1: 301-307.
- 414 26. Glickmann E, Dessaux Y (1995) A critical examination of the specificity of the salkowski reagent for  
415 indolic compounds produced by phytopathogenic bacteria. *Applied & Environmental*  
416 *Microbiology* 61: 793-796.
- 417 27. Xue Q, Li D, Tang L (2000) Improvement of fluorescence method for the determination of gibberellin.



- 418 Journal of Northwest A&F University(Natural Science Edition) 28: 34-39.
- 419 28. Tunçtürk M, Tunçtürk R, Yıldırım B, Çiftçi V (2011) Changes of micronutrients, dry weight and plant  
420 development in canola (*Brassica napus* L.) cultivars under salt stres. *African Journal of*  
421 *Biotechnology* 10: 3726-3730.
- 422 29. Buck JD, Cleverdon RC (1960) The Spread Plate as a Method for the Enumeration of Marine Bacteria.  
423 *Limnology & Oceanography* 5: 78-80.
- 424 30. Colwell JD (1963) The estimation of phosphorus fertilizer requirements of wheat in southern New  
425 South Wales by soil analysis. *Aust J Exp Agric Anim Husb* 3:190-197. *Australian Journal of*  
426 *Experimental Agriculture* 3.
- 427 31. Xia BX, Song XL, Ding L, Jiang JC, Yang LN (2011) Determination of Total Phosphorus in Marine  
428 Sediments by Microwave Digestion-Phosphorus Vanadium Molybdenum Yellow  
429 Spectrophotometry. *Rock & Mineral Analysis* 30: 555-559.
- 430 32. Cataldo D, Maroon M, Schrader L, Youngs V (1975) Rapid colorimetric determination of nitrate in  
431 plant tissue by nitration of salicylic acid 1. *Communications in Soil Science & Plant Analysis* 6:  
432 71-80.
- 433 33. Pea A, Rmn K, Jwb S (1988) Inorganic phosphate solubilization by two *Penicillium* species in solution  
434 culture and soil. *Soil Biology & Biochemistry* 20: 459-464.
- 435 34. Hanif MK, Hameed S, Imran A, Naqqash T, Shahid M, et al. (2015) Isolation and characterization of  
436 a  $\beta$ -propeller gene containing phosphobacterium *Bacillus subtilis* strain KPS-11 for growth  
437 promotion of potato (*Solanum tuberosum* L.). *Frontiers in Microbiology* 6: 583.
- 438 35. Sahay R, Patra DD (2014) Identification and performance of sodicity tolerant phosphate solubilizing  
439 bacterial isolates on *Ocimum basilicum* in sodic soil. *Ecological Engineering* 71: 639-643.
- 440 36. Shahid M, Hameed S, Tariq M, Zafar M, Ali A, et al. (2014) Characterization of mineral phosphate-  
441 solubilizing bacteria for enhanced sunflower growth and yield-attributing traits. *Annals of*  
442 *Microbiology* 65: 1525-1536.
- 443 37. Schmutz J, Cannon SB, Schlueter J, Ma JX, Mitros T, et al. (2011) Genome sequence of the  
444 palaeopolyploid soybean. *Nature* 463: 178-183.
- 445 38. Xiong ZT, Wang H (2005) Copper toxicity and bioaccumulation in Chinese cabbage (*Brassica*  
446 *pekinensis* Rupr.). *Environmental Toxicology* 20: 188-194.
- 447 39. Badawi MA, Zaid A, Alhadrami GA (2010) Role of phosphorus solubilizing microorganisms in the  
448 growth of date palm trees. *Acta Horticulturae* 882: 115-120.
- 449 40. Rodríguez H, Fraga R (1999) Phosphate solubilizing bacteria and their role in plant growth promotion.  
450 *Biotechnology Advances* 17: 319.
- 451 41. Sharon JA, Hathwaik LT, Glenn GM, Imam SH, Lee CC (2016) Isolation of efficient phosphate  
452 solubilizing bacteria capable of enhancing tomato plant growth. *Journal of Soil Science & Plant*  
453 *Nutrition* 16.
- 454 42. Li Y, Yao T, Rong LY (2010) Characteristics of IAA secretion and phosphate dissolving of phosphate-  
455 solubilizing bacteria and its effect on alfalfa growth. *Acta Agrestia Sinica* 18: 84-88.
- 456 43. Panda P, Chakraborty S, Ray DP, Mahato B, Pramanik B, et al. (2015) Solubilization of Tricalcium  
457 Phosphate and Production of IAA by Phosphate Solubilizing Bacteria Isolated from Tea  
458 Rhizosphere Soil. 60: 803.
- 459 44. Kang SM, Radhakrishnan R, You YH, Joo GJ, Lee IJ, et al. (2014) Phosphate Solubilizing *Bacillus*  
460 *megaterium* mj1212 Regulates Endogenous Plant Carbohydrates and Amino Acids Contents to  
461 Promote Mustard Plant Growth. *Indian Journal of Microbiology* 54: 427-433.

- 462 45. Shahid M, Hameed S, Tariq M, Zafar M, Ali A, et al. (2014) Characterization of mineral phosphate-  
463 solubilizing bacteria for enhanced sunflower growth and yield-attributing traits. *Annals of*  
464 *Microbiology* 65: 1-12.
- 465 46. Kaur G, Reddy MS (2015) Effects of Phosphate-Solubilizing Bacteria, Rock Phosphate and Chemical  
466 Fertilizers on Maize-Wheat Cropping Cycle and Economics. *PEDOSPHERE* 25: 428-437.
- 467 47. Osorio NW, Habte M (2014) Effect of a phosphate-solubilizing fungus and an arbuscular mycorrhizal  
468 fungus on leucaena seedlings in tropical soils with contrasting phosphate sorption capacity.  
469 *Plant & Soil* 389: 375-385.
- 470 48. Shankar M, Ponraj P, Ilakkiam D, Gunasekaran P (2011) Root colonization of a rice growth promoting  
471 strain of *Enterobacter cloacae*. *Journal of Basic Microbiology* 51: 523-530.
- 472 49. Swarnalakshmi K, Prasanna R, Kumar A, Pattnaik S, Chakravarty K, et al. (2013) Evaluating the  
473 influence of novel cyanobacterial biofilmed biofertilizers on soil fertility and plant nutrition in  
474 wheat. *European Journal of Soil Biology* 55: 107-116.
- 475 50. Hameeda B, Harini GRupela OP, Wani SP, Reddy G (2008) Growth promotion of maize by phosphate-  
476 solubilizing bacteria isolated from composts and macrofauna. *Microbiol Res. Microbiological*  
477 *Research* 163: 234-242.
- 478 51. Akbari GA, Eftekhari G, Allahdadi I (2010) Evaluation of rock and super phosphates effects on yield  
479 and yield components of Rice (*Oriza sativa* L.) with and without Phosphate Solubilizing Bacteria.  
480 *Eurasian J Agron* 3: 51-58.
- 481 52. Sundara B, Natarajan V, Hari K (2002) Influence of phosphorus solubilizing bacteria on the changes  
482 in soil available phosphorus and sugarcane and sugar yields. *Field Crops Research* 77: 43-49.
- 483 53. Lin TT, Wang JJ, Wang L, Chen X, Hou XL, et al. (2014) Major Gene Plus Polygene Inheritance of  
484 Vitamin C Content in Non-heading Chinese Cabbage. *Acta Agronomica Sinica* 40: 1733.
- 485 54. Hui Y, Bing B, Mingyi L, Qinyun L, Cuiling C (2016) Effects of nitrogen forms on the phosphate-  
486 solubilizing activity of phosphate solubilizing bacteria, growth and quality of pakchoi. *Soil and*  
487 *Fertilizer Sciences in China*: 110-116.
- 488 55. Ruprich J (2013) *Nitrite and Nitrate in Human Health and Disease*: Springer, Berlin. 58-58 p.
- 489 56. Compant S, Clément C, Sessitsch A (2010) Plant growth-promoting bacteria in the rhizo- and  
490 endosphere of plants: Their role, colonization, mechanisms involved and prospects for  
491 utilization. *Soil Biology & Biochemistry* 42: 669-678.
- 492 57. Lugtenberg BJJ, Linda Dekkers A, Bloemberg GV (2001) MOLECULAR DETERMINANTS OF  
493 RHIZOSPHERE COLONIZATION BY PSEUDOMONAS. *Annual Review of Phytopathology* 39: 461.
- 494 58. Liu Y, Chen SF, Ji\_Lun LI (2003) Colonization Pattern of *Azospirillum brasilense* Yu62 on Maize Roots.  
495 *植物学报(英文版)* 45: 748-752.
- 496 59. Peng Y, Tan YJ, Huang YC (2010) Colonization of gfp tagged *Paenibacillus polymyxa* strain around  
497 tomato roots. *Chinese Journal of Biological Control* 26: 307-311.
- 498 60. Hallmann J, Berg G (2006) Spectrum and Population Dynamics of Bacterial Root Endophytes.
- 499 61. Lugtenberg BJJ, Dekkers LC (1999) What makes *Pseudomonas* bacteria rhizosphere competent?  
500 *Environmental Microbiology* 1: 9-13.
- 501 62. TS W, HP B, E G, JM V (2003) Root exudation and rhizosphere biology. *Plant physiology* 132: 44.
- 502 63. James EK, Gyaneshwar P, Mathan N, Barraquio WL, Reddy PM, et al. (2002) Infection and  
503 colonization of rice seedlings by the plant growth-promoting bacterium *Herbaspirillum*  
504 *seropedicae* Z67. *Molecular plant-microbe interactions* : *MPMI* 15: 894.
- 505 64. Cavalcante VA, Dobereiner J (1988) A new acid-tolerant nitrogen-fixing bacterium associated with

506 sugarcane. *Plant & Soil* 108: 23-31.  
507 65. S C, H K, A S, J N, E AB, et al. (2008) Endophytic colonization of *Vitis vinifera* L. by *Burkholderia*  
508 phytofirmans strain PsJN: from the rhizosphere to inflorescence tissues. *FEMS microbiology*  
509 *ecology* 63: 84-93.  
510

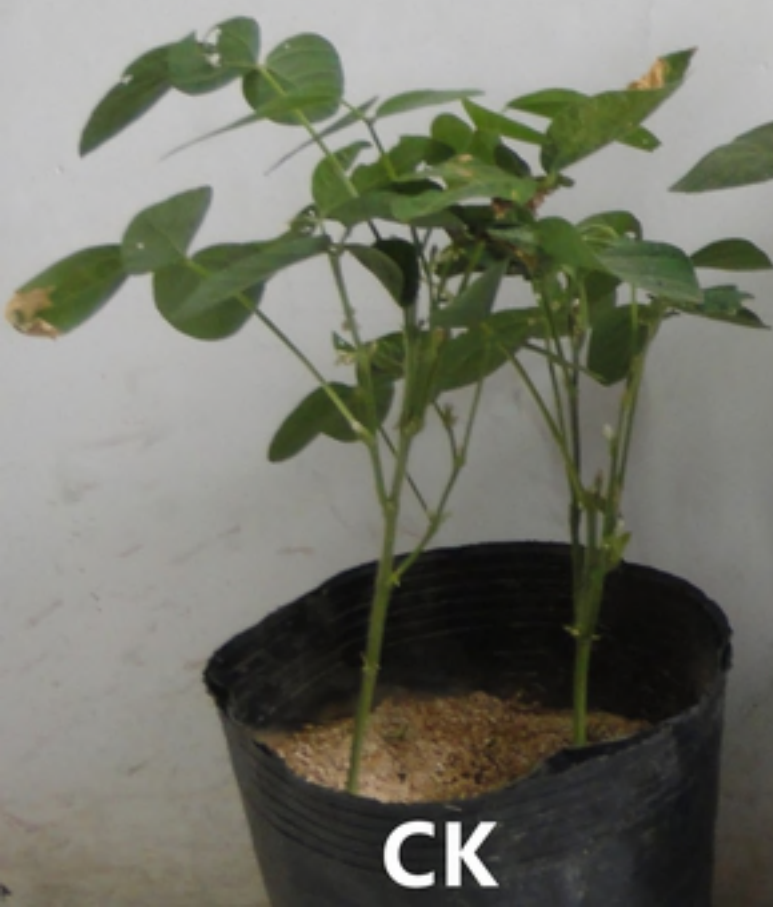

**CK**

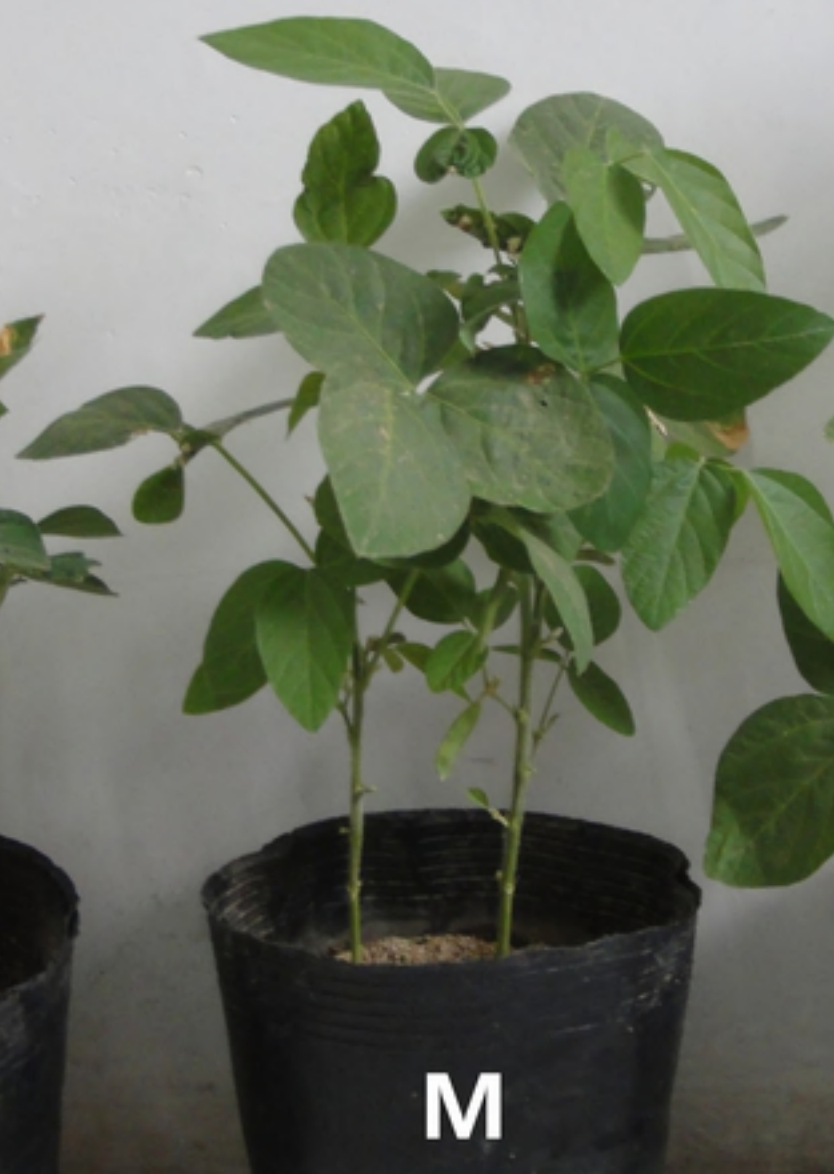

**M**

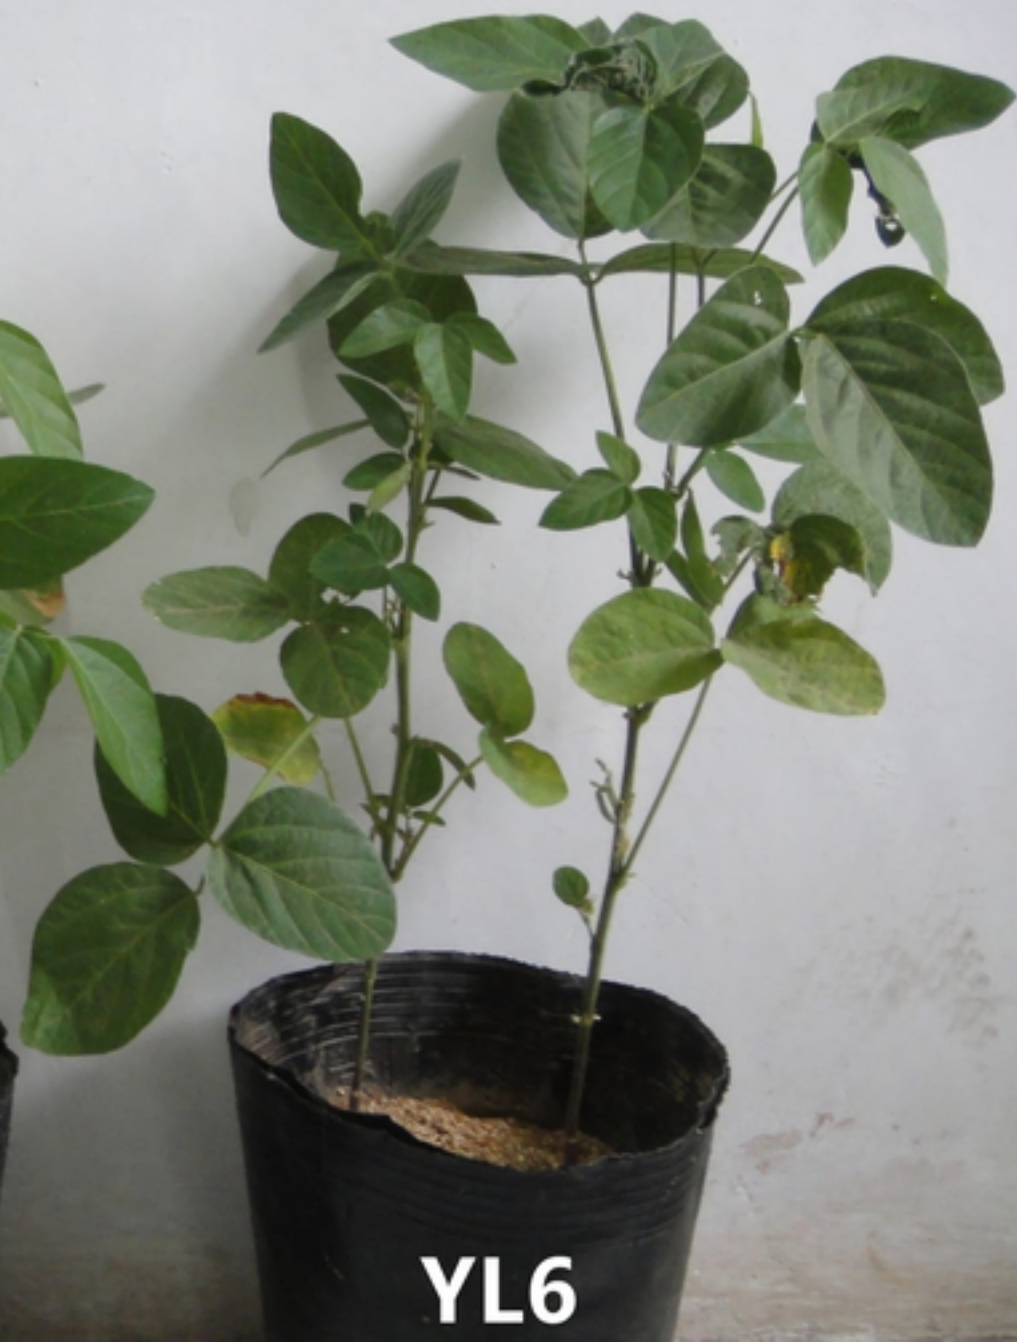

**YL6**

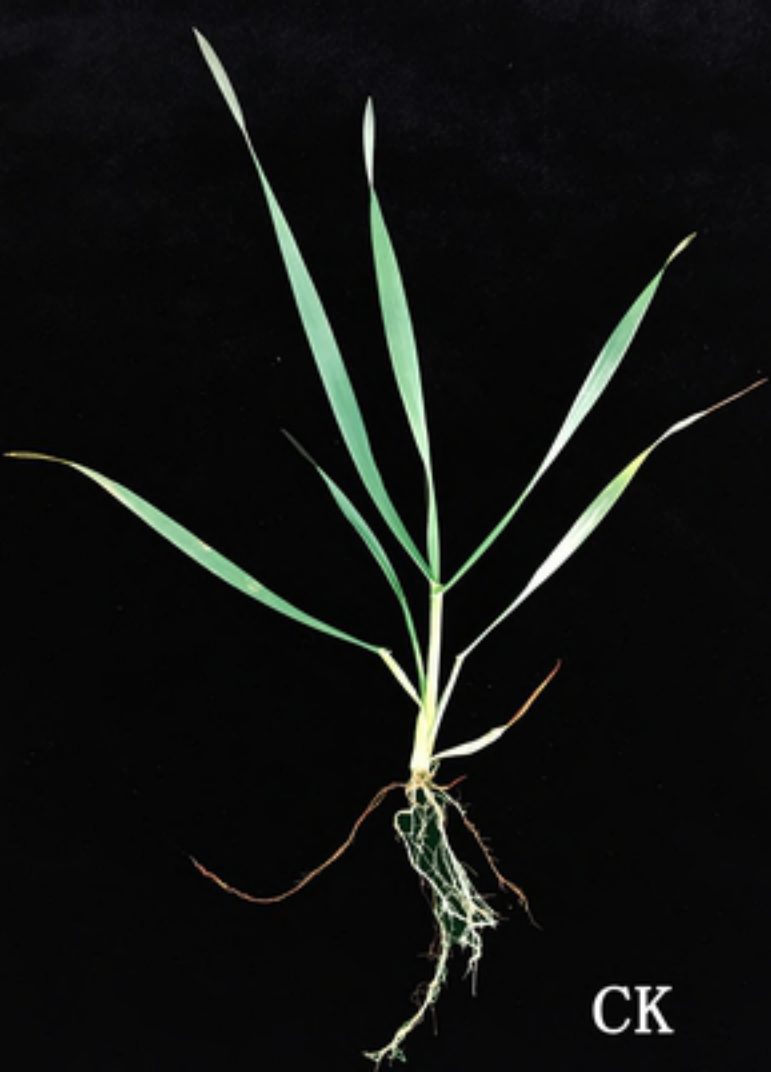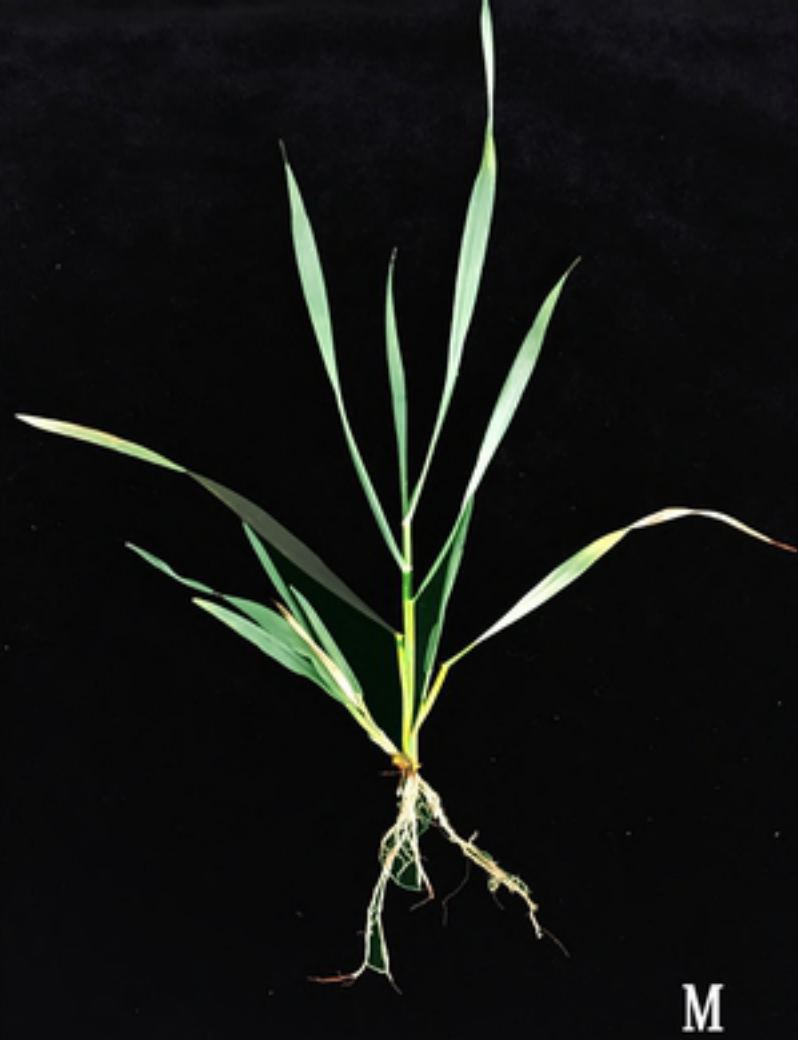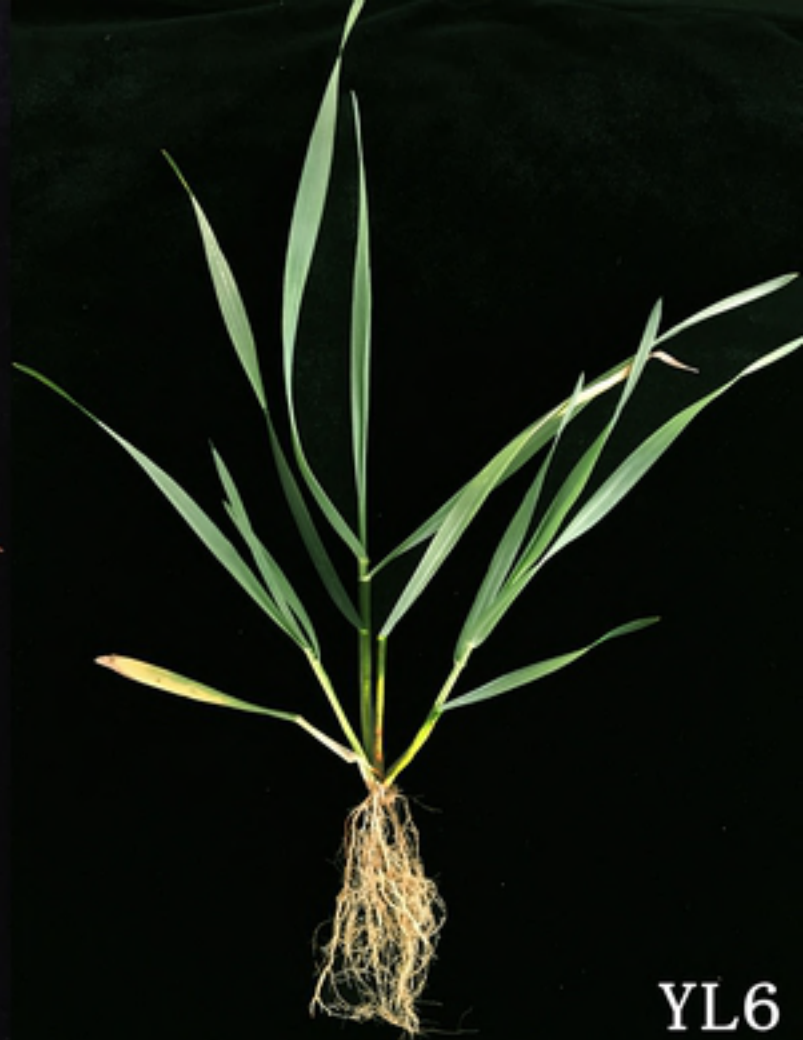

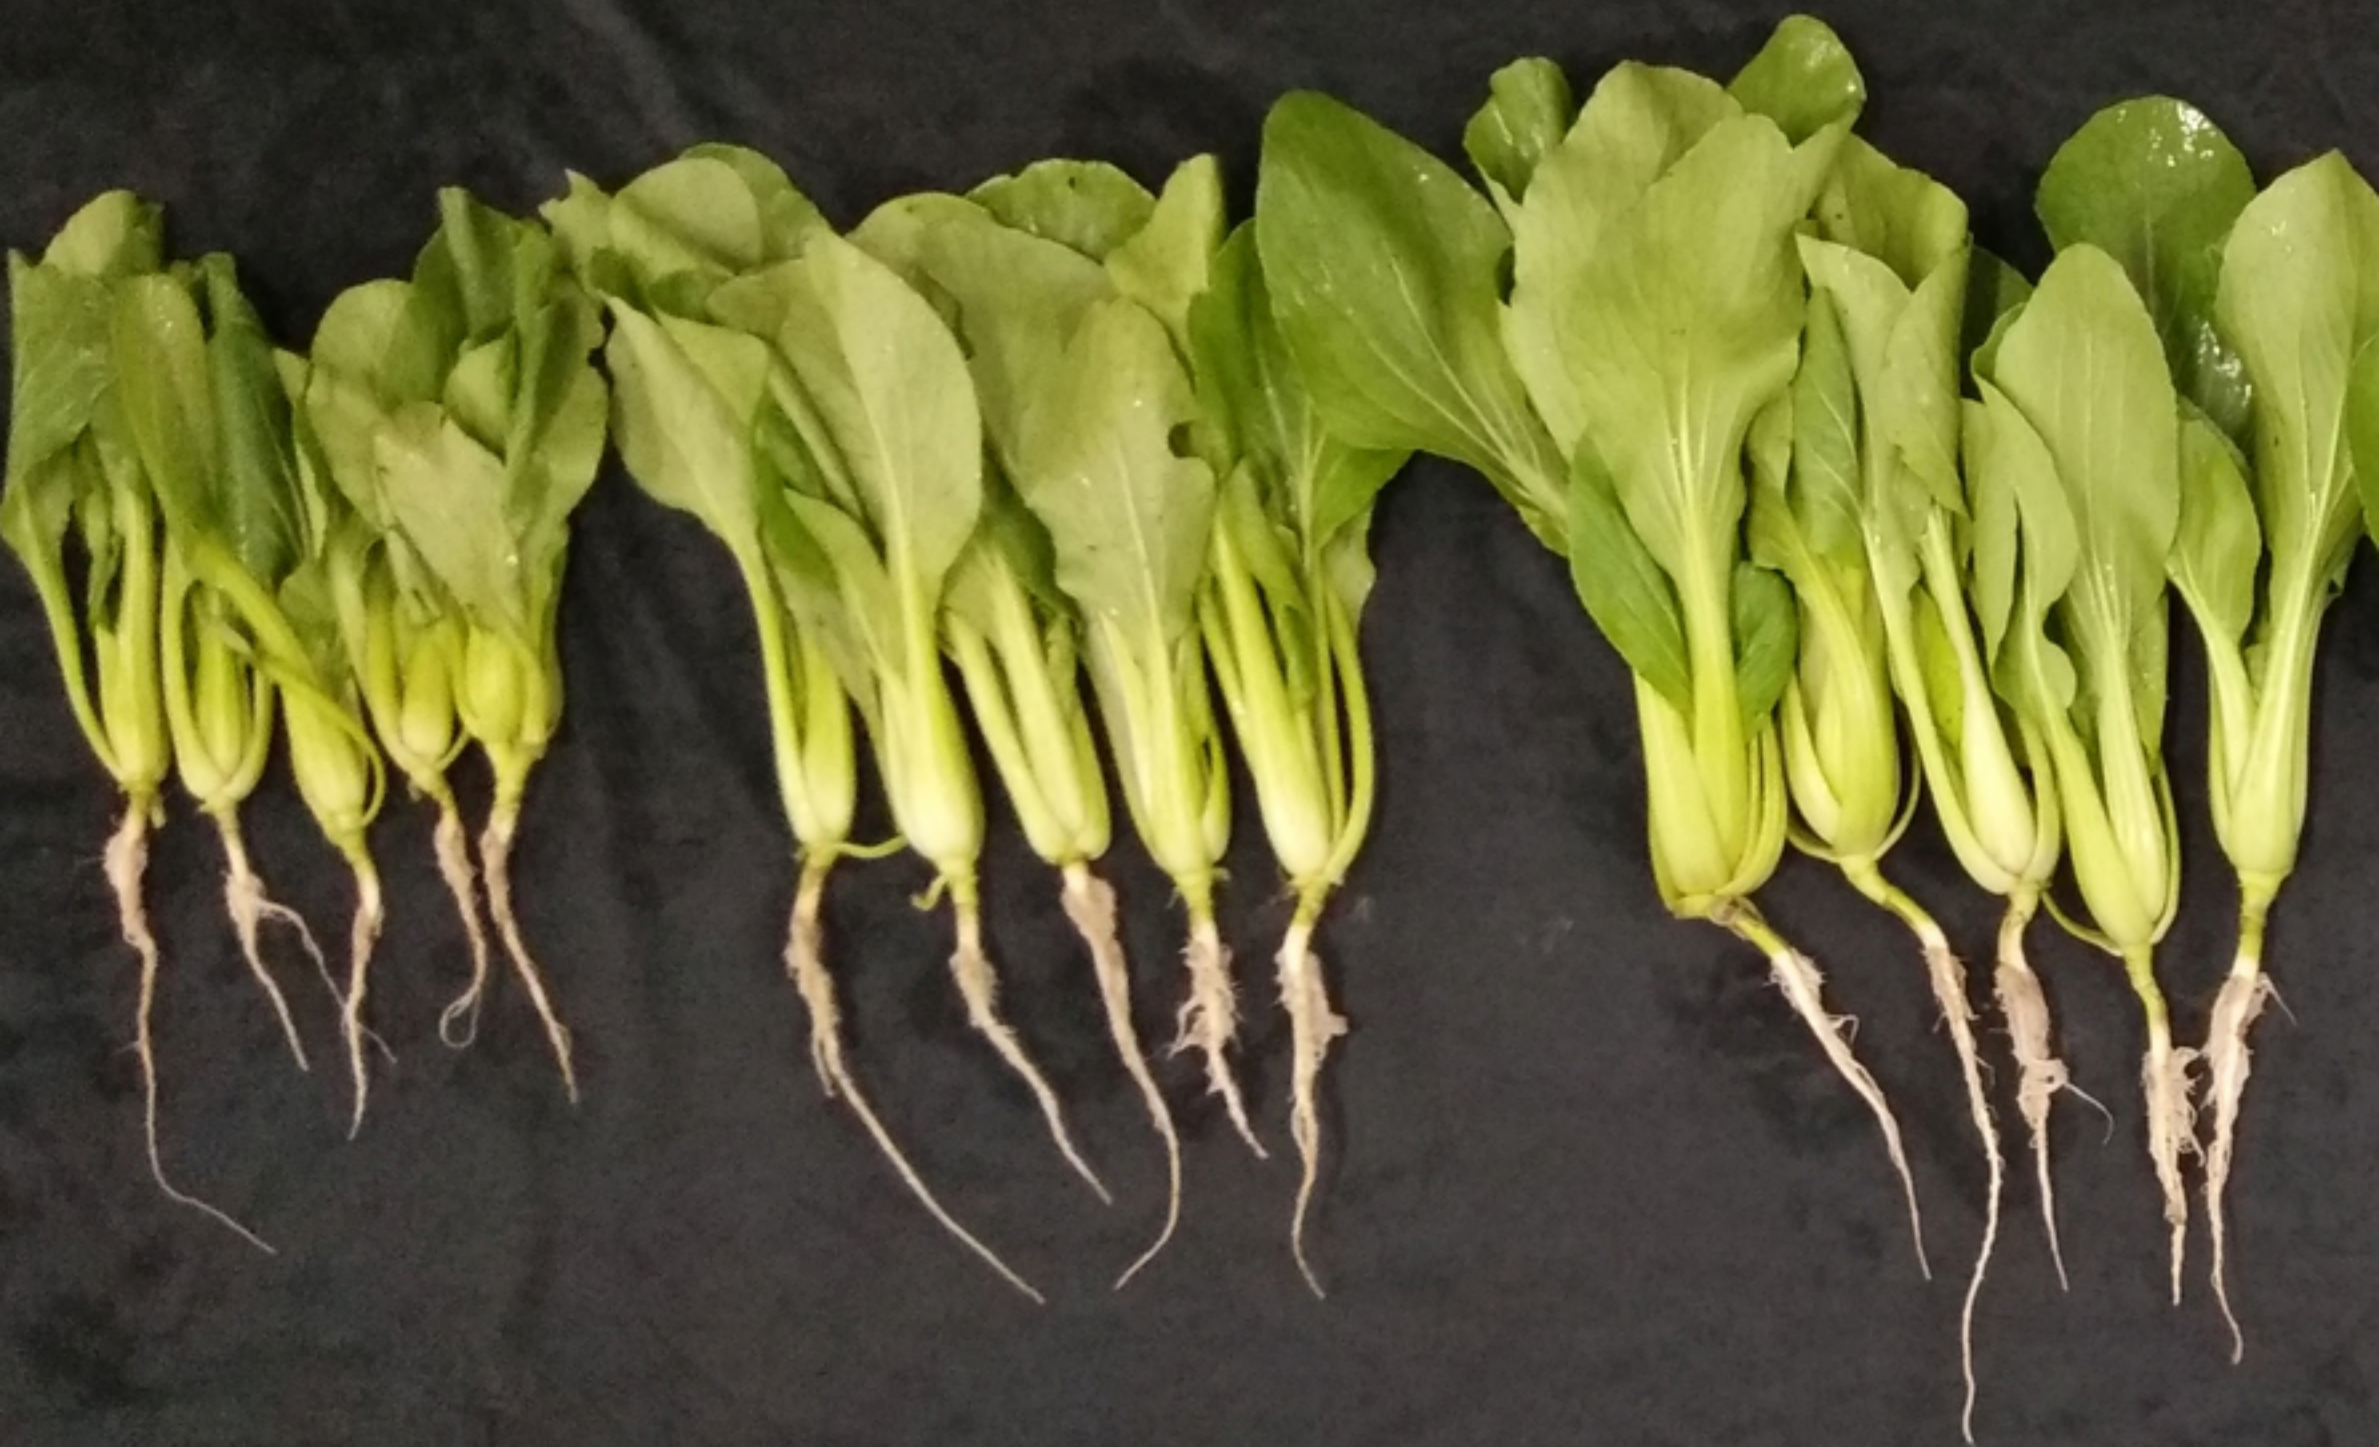

CK

M

YL6

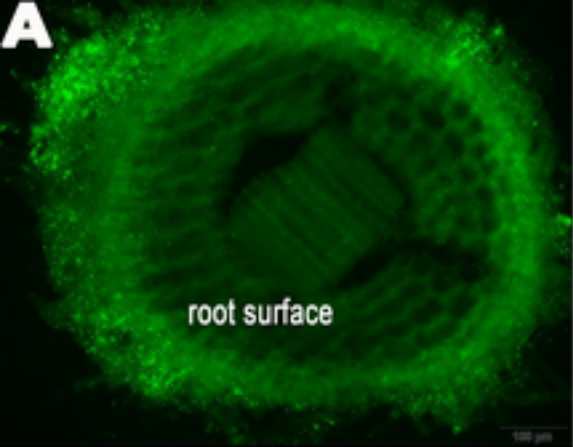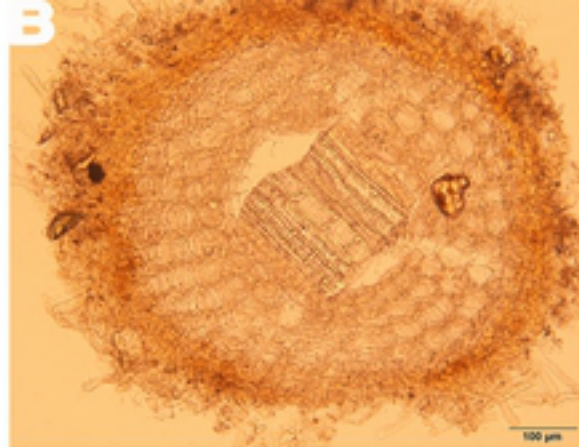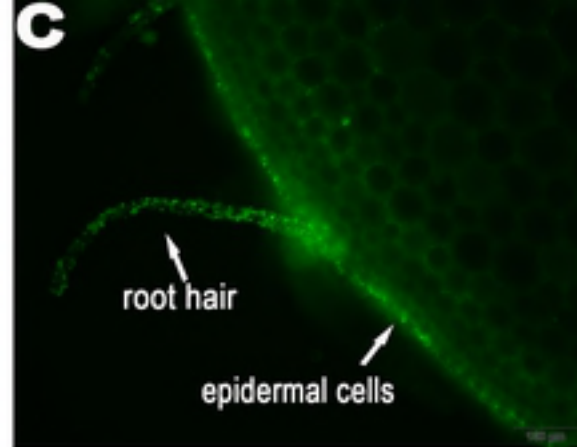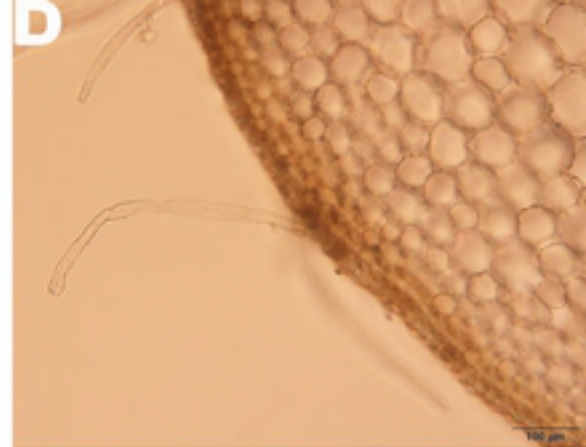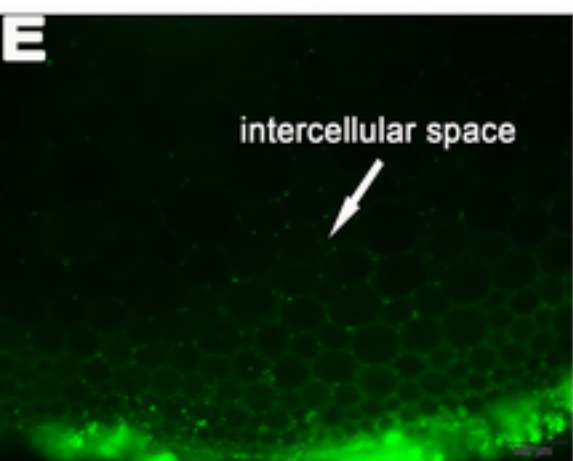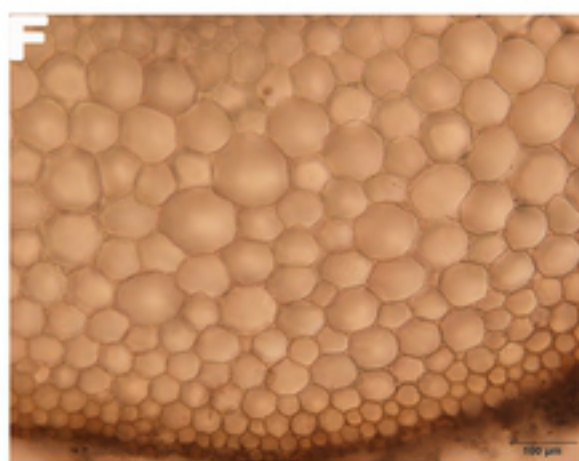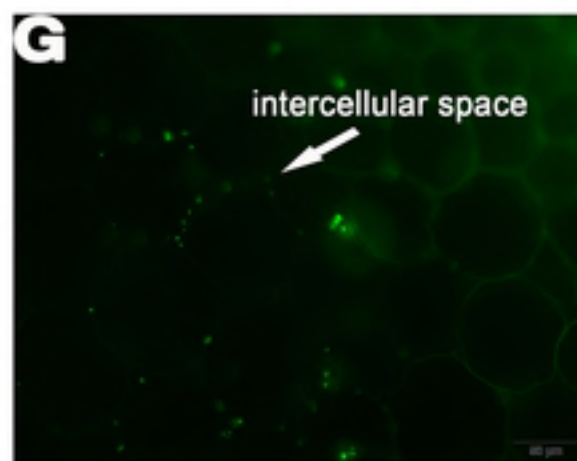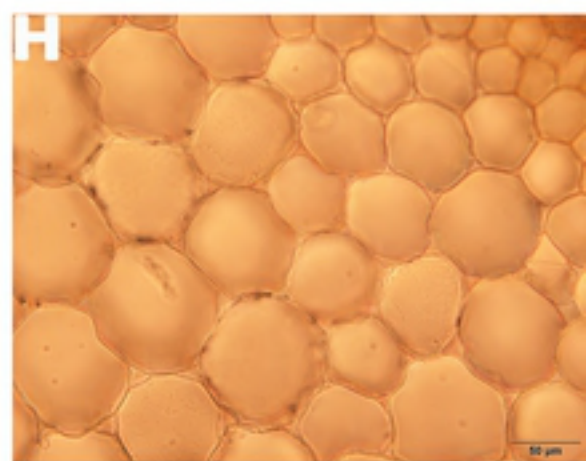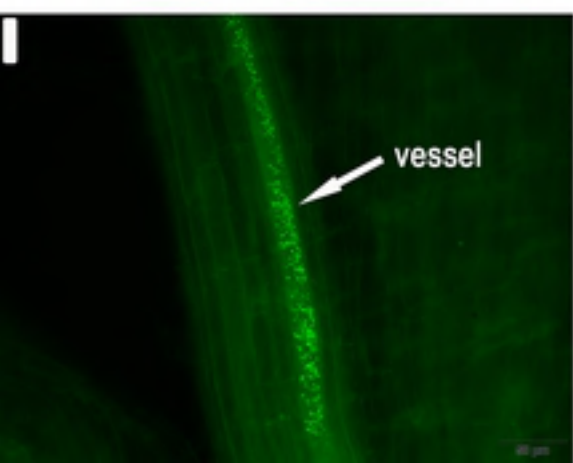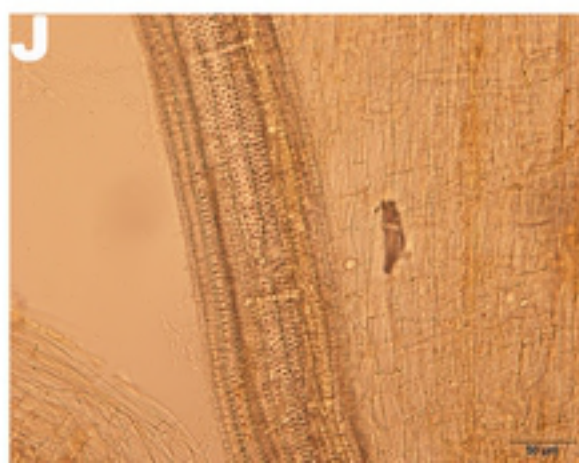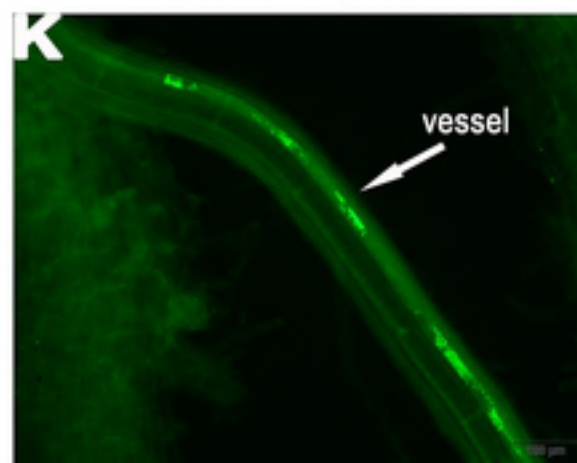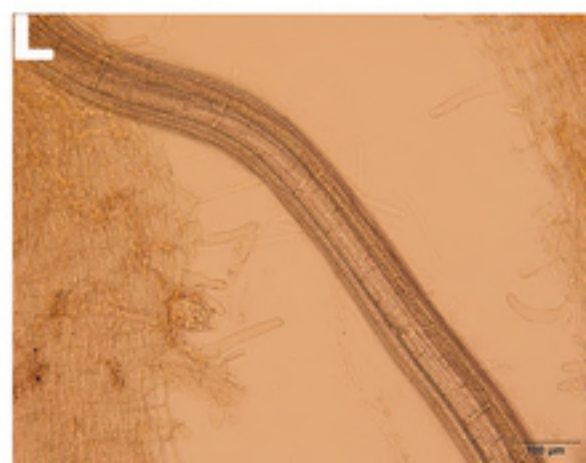

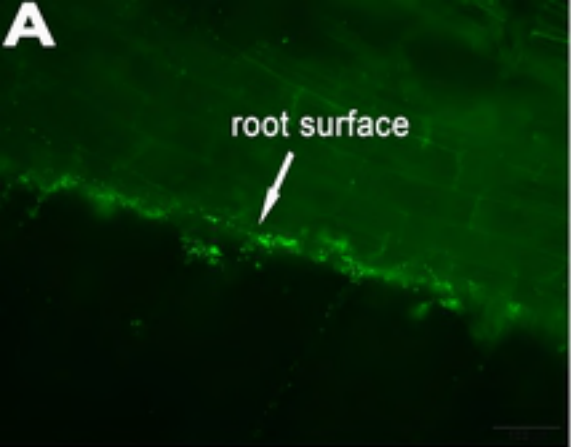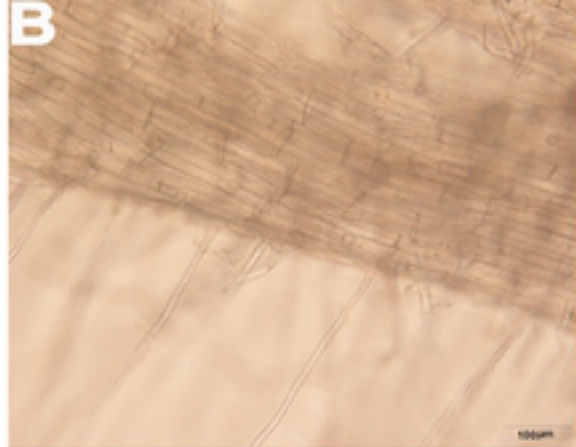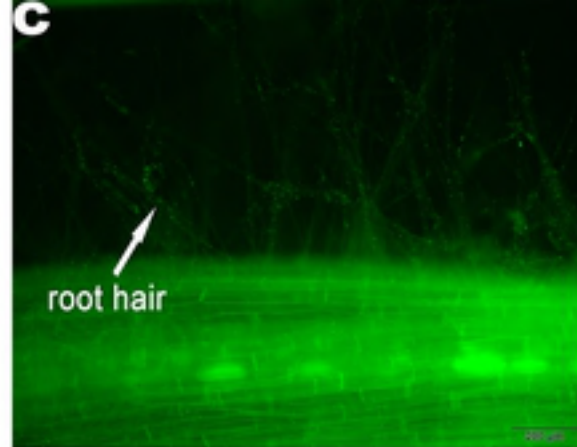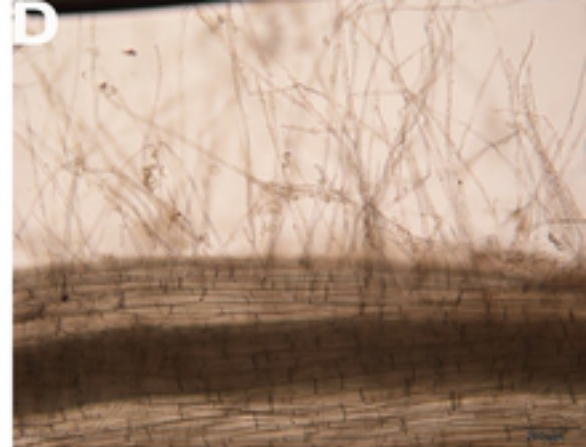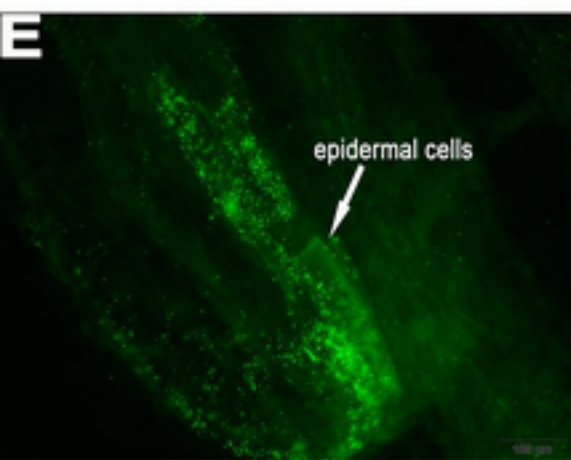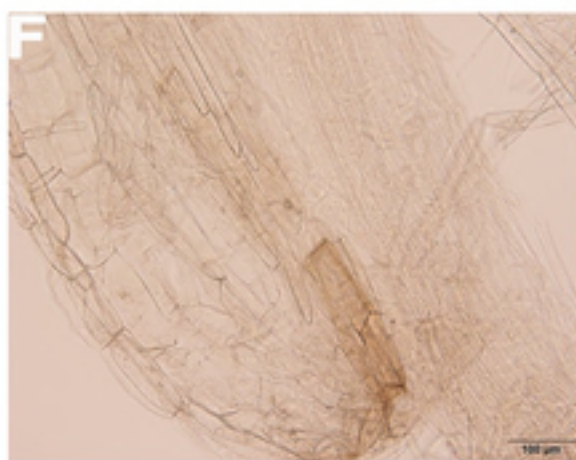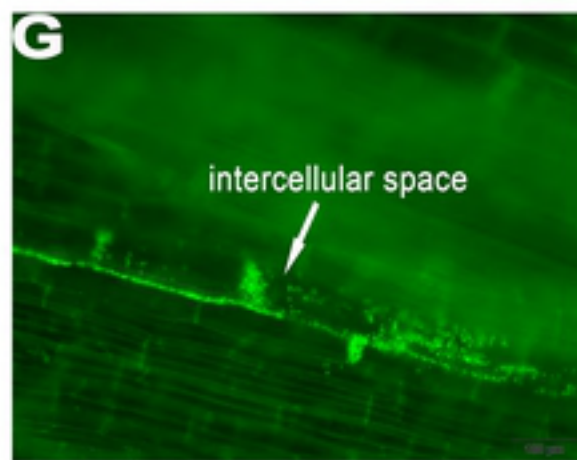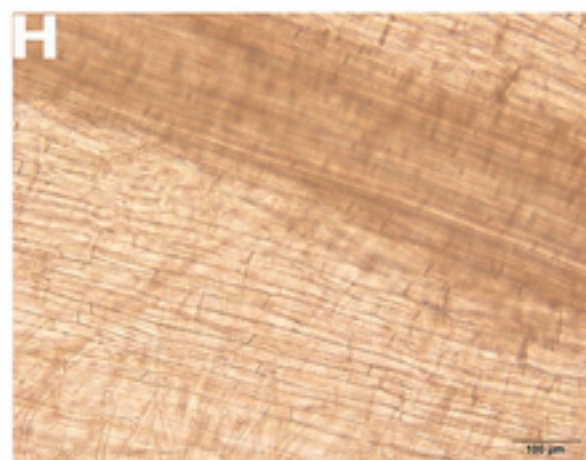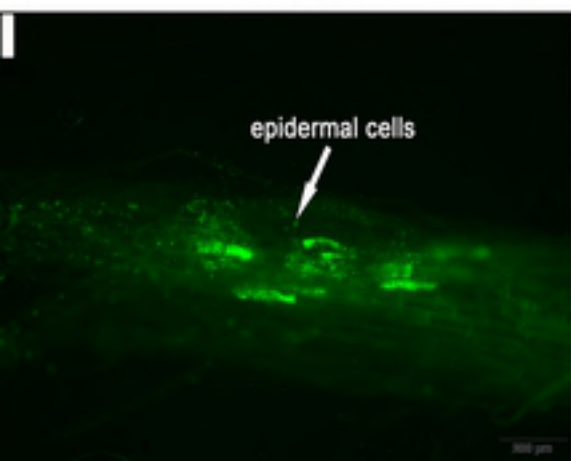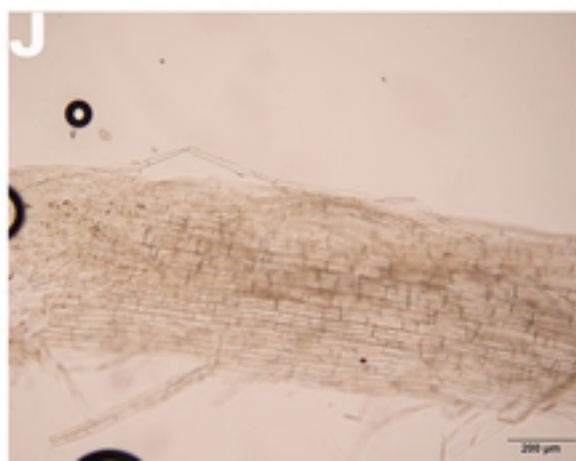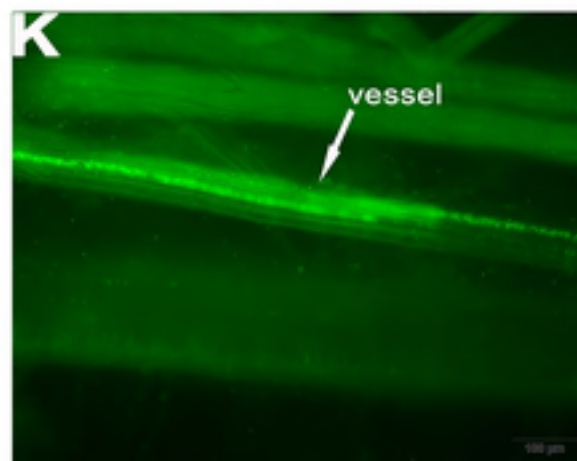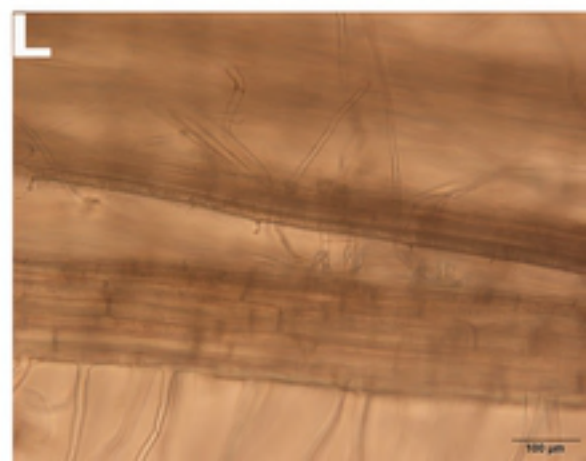



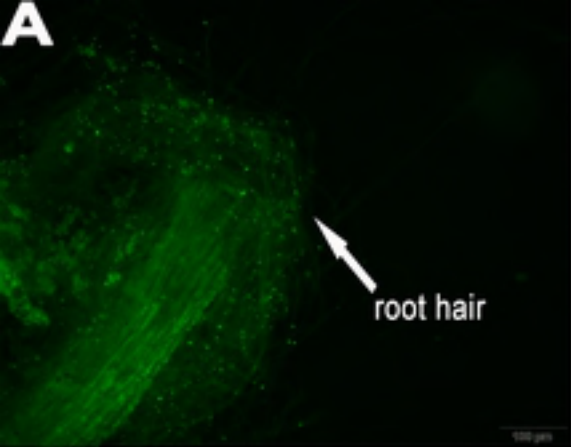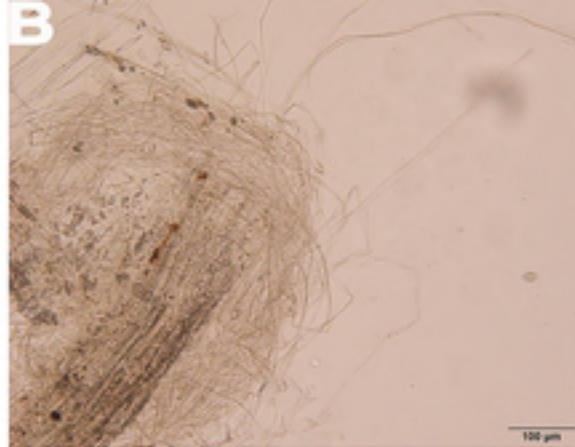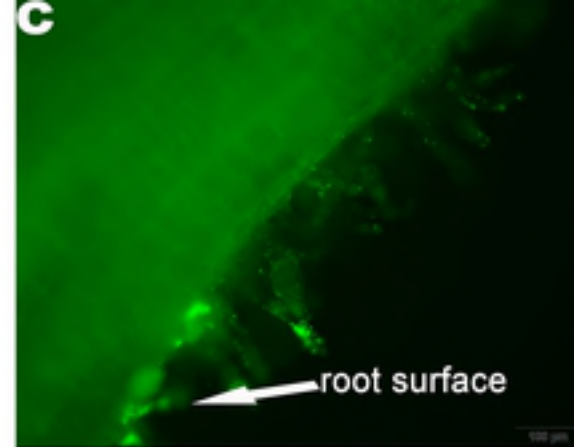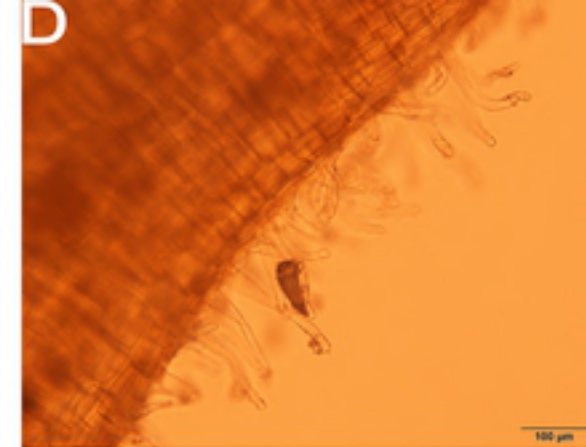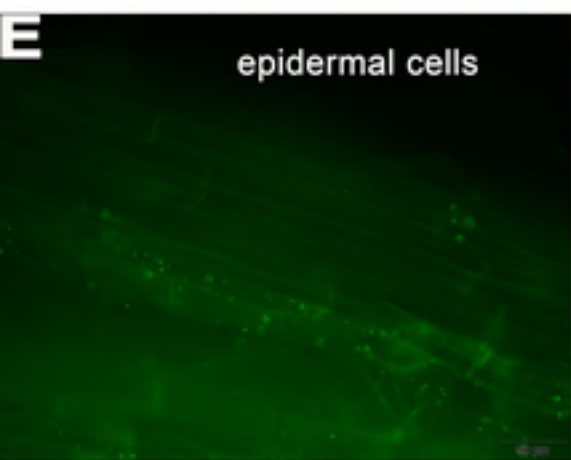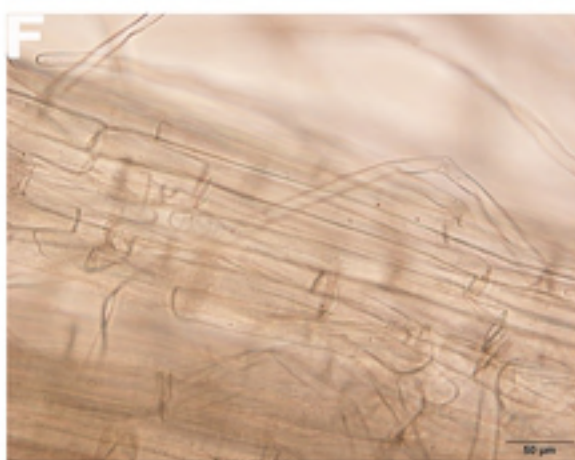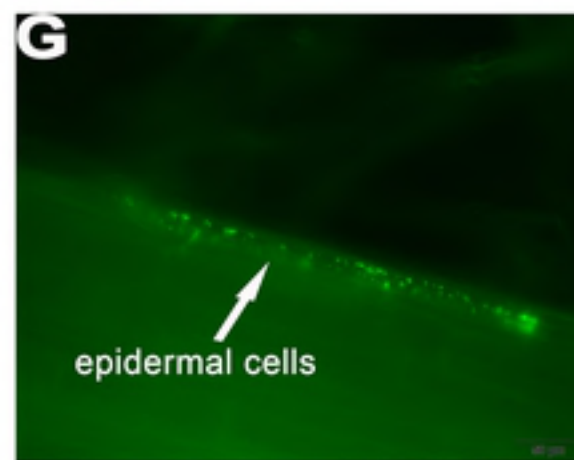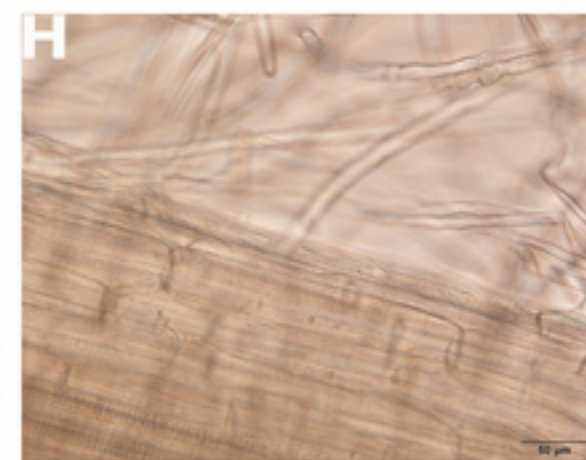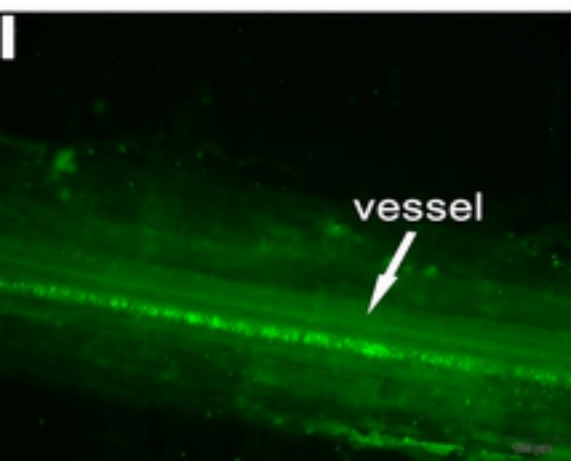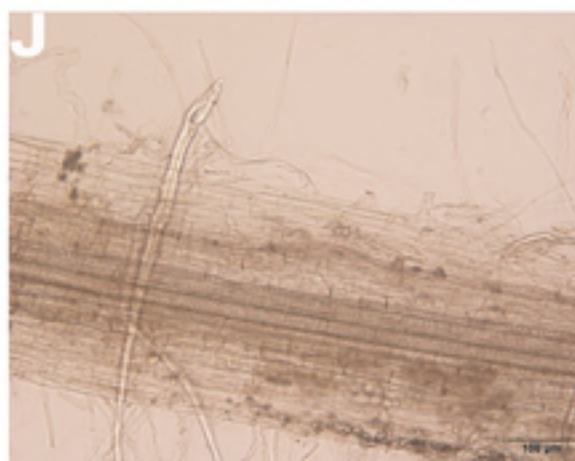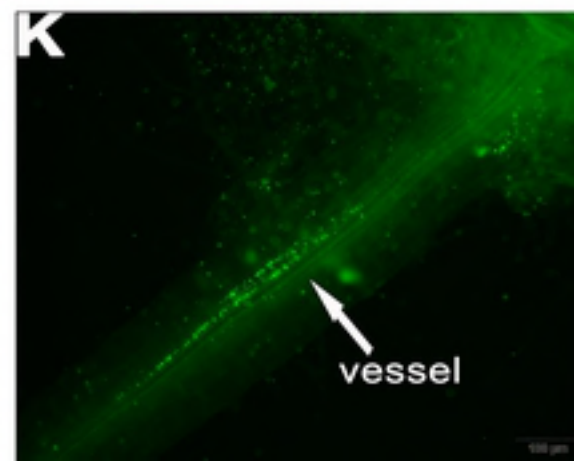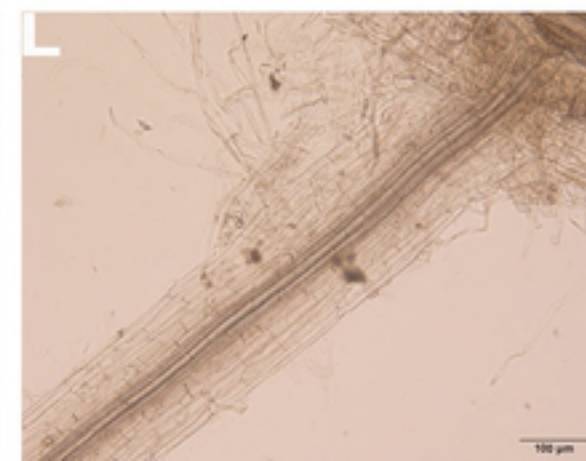

Source: http://biorxiv.org/content/10.1101/353946v1.full.pdf
